# Supplementary material for: Determination of Eugenol Residues in Fish Tissue, Transport, and Temporary Water of Aquatic Product by Gas Chromatography–Tandem Mass Spectrometry with Application of the Electrospun Nanofibrous Membrane
Source: MDPI journal article supplement (doi:10.3390/foods13020238), 2024-01-11
Supplement: s1 [file s1]

Table S1 The 2021 Aquatic Product Sampling Record Form

| Sampling month | Name                               | Sampling amount | Base (pieces) | Place of origin     | Sampling area | Sampling date |
|----------------|------------------------------------|-----------------|---------------|---------------------|---------------|---------------|
| June           | <i>Ophiocephalus argus</i>         | 1 piece         | 1000          | Zhejiang            | Shanghai      | 2021/6/16     |
|                | <i>Mugil cephalus</i>              | 1 piece         | 1000          | Yancheng, Jiangsu   | Shanghai      | 2021/6/16     |
|                | <i>Oreochromis sp p</i>            | 1 piece         | 1000          | Xinghua, Jiangsu    | Shanghai      | 2021/6/16     |
|                | <i>Scophthalmus maximus</i>        | 2 pieces        | 50            | Shandong            | Shanghai      | 2021/6/16     |
|                | <i>Lateolabrax japonicus</i>       | 1 piece         | 50            | Jiangsu             | Shanghai      | 2021/6/16     |
|                | <i>Siniperca chuatsi</i>           | 1 piece         | 50            | Guangzhou           | Shanghai      | 2021/6/16     |
|                | <i>Acipensersinensis</i>           | 1 piece         | 50            | Jiangsu             | Shanghai      | 2021/6/16     |
|                | <i>Epinephelus</i>                 | 2 pieces        | 50            | Fujian              | Shanghai      | 2021/6/16     |
|                | <i>Larimichthys crocea</i>         | 1 piece         | 50            | Xiangshan, Zhejiang | Shanghai      | 2021/6/16     |
|                | <i>Oncorhynchus</i>                | 1 block         | 10            | Norway              | Shanghai      | 2021/6/16     |
|                | <i>Concha Ostreae</i>              | 4 pieces        | 100           | France              | Shanghai      | 2021/6/16     |
|                | <i>Pseudocardium sachalinense</i>  | 4 pieces        | 200           | Canada              | Shanghai      | 2021/6/16     |
|                | <i>Anoplopoma fimbria</i>          | 1 piece         | 20            | Norway              | Shanghai      | 2021/6/16     |
|                | <i>Cipangopaludina cathayensis</i> | 0.5kg           | 1000          | Hubei               | Shanghai      | 2021/6/16     |
|                | <i>Margarya francheti</i>          | 0.6kg           | 2000          | Jiangsu             | Shanghai      | 2021/6/16     |
|                | <i>Placopecta magellanicus</i>     | 4 pieces        | 20            | Dalian              | Shanghai      | 2021/6/16     |
|                | <i>Thunnus obesus</i>              | 1 block         | 20            | Norway              | Shanghai      | 2021/6/16     |
| July           | <i>Siniperca chuatsi</i>           | 1 piece         | 20            | Fujian              | Fujian        | 2021/7/13     |
|                | <i>Megalobrama amblycephala</i>    | 2 pieces        | 200           | Fujian              | Fujian        | 2021/7/13     |
|                | <i>Scophthalmus maximus</i>        | 2 pieces        | 500           | Shandong            | Fujian        | 2021/7/13     |
|                | <i>Lateolabrax japonicus</i>       | 2 pieces        | 500           | Fujian              | Fujian        | 2021/7/13     |
|                | <i>Pagrosomus major</i>            | 2 pieces        | 200           | Fujian              | Fujian        | 2021/7/13     |
|                | <i>Lateolabrax japonicus</i>       | 2 pieces        | 100           | Zhejiang            | Zhejiang      | 2021/7/15     |
|                | <i>Epinephelus</i>                 | 2 pieces        | 200           | Zhejiang            | Zhejiang      | 2021/7/15     |

|        |                                   |          |      |                      |          |           |
|--------|-----------------------------------|----------|------|----------------------|----------|-----------|
|        | <i>Scophthalmus maximus</i>       | 2 pieces | 100  | Shandong             | Zhejiang | 2021/7/15 |
|        | <i>Pampus sinensis</i>            | 2 pieces | 50   | Zhejiang             | Zhejiang | 2021/7/15 |
|        | <i>Acipensersinensis</i>          | 1 piece  | 20   | Zhejiang             | Zhejiang | 2021/7/15 |
|        | <i>Siniperca chuatsi</i>          | 2 pieces | 100  | Jiangsu              | Shanghai | 2021/7/16 |
|        | <i>Scophthalmus maximus</i>       | 2 pieces | 150  | Shandong             | Shanghai | 2021/7/16 |
|        | <i>Epinephelus</i>                | 2 pieces | 100  | Zhejiang             | Shanghai | 2021/7/16 |
|        | <i>Carassius aumtus</i>           | 3 pieces | 1000 | Jiangsu              | Shanghai | 2021/7/16 |
|        | <i>Ophiocephalus argus</i>        | 1 piece  | 1000 | Shandong             | Shanghai | 2021/7/16 |
|        | <i>Oncorhynchus</i>               | 0.6kg    | 50kg | Norway               | Fujian   | 2021/7/13 |
|        | <i>Anoplopoma fimbria</i>         | 1.1kg    | 50kg | America              | Fujian   | 2021/7/13 |
|        | <i>Placopecta magellanicus</i>    | 1kg      | 50kg | Shandong             | Fujian   | 2021/7/13 |
|        | <i>Thunnus obesus</i>             | 1kg      | 50kg | Canada               | Fujian   | 2021/7/13 |
|        | <i>Pseudocardium sachalinense</i> | 1kg      | 50kg | Canada               | Fujian   | 2021/7/13 |
|        | <i>Oncorhynchus</i>               | 1kg      | 50kg | Norway               | Shanghai | 2021/7/16 |
|        | <i>Concha Ostreae</i>             | 6 pieces | 200  | Zhanjiang, Guangdong | Shanghai | 2021/7/16 |
|        | <i>Anoplopoma fimbria</i>         | 1kg      | 50kg | America              | Shanghai | 2021/7/16 |
|        | <i>Pseudocardium sachalinense</i> | 1kg      | 50kg | Canada               | Shanghai | 2021/7/16 |
| August | <i>Thalassoma bifasciatum</i>     | 1 piece  | 20   | Fujian               | Fujian   | 2021/8/9  |
|        | <i>Lateolabrax japonicus</i>      | 2 pieces | 200  | Fujian               | Fujian   | 2021/8/9  |
|        | <i>Siniperca chuatsi</i>          | 1 piece  | 50   | Guangdong            | Fujian   | 2021/8/9  |
|        | <i>Pagrosomus major</i>           | 2 pieces | 50   | Fujian               | Fujian   | 2021/8/9  |
|        | <i>Scophthalmus maximus</i>       | 2 pieces | 200  | Shandong             | Fujian   | 2021/8/9  |
|        | <i>Acipensersinensis</i>          | 2 pieces | 100  | Zhejiang             | Zhejiang | 2021/8/11 |
|        | <i>Scophthalmus maximus</i>       | 2 pieces | 200  | Shandong             | Zhejiang | 2021/8/11 |
|        | <i>Pagrosomus major</i>           | 2 pieces | 100  | Zhejiang             | Zhejiang | 2021/8/11 |

|          |                             |          |      |           |          |           |
|----------|-----------------------------|----------|------|-----------|----------|-----------|
|          | <i>Perca fluviatilis</i>    | 2 pieces | 50   | Zhejiang  | Zhejiang | 2021/8/11 |
|          | <i>Siniperca chuatsi</i>    | 1 piece  | 20   | Guangdong | Zhejiang | 2021/8/11 |
|          | <i>Epinephelus</i>          | 2 pieces | 100  | Guangdong | Shanghai | 2021/8/12 |
|          | <i>Siniperca chuatsi</i>    | 2 pieces | 150  | Guangdong | Shanghai | 2021/8/12 |
|          | <i>Scophthalmus maximus</i> | 2 pieces | 100  | Shandong  | Shanghai | 2021/8/12 |
|          | <i>Ophiocephalus argus</i>  | 1 piece  | 1000 | Anhui     | Shanghai | 2021/8/12 |
|          | <i>Pagrosomus major</i>     | 2 pieces | 100  | Zhejiang  | Shanghai | 2021/8/12 |
| November | <i>Pampus sinensis</i>      | 2 pieces | 20   | Fujian    | Shanghai | 2021/11/6 |
|          | <i>Siniperca chuatsi</i>    | 2 pieces | 200  | Jiangsu   | Shanghai | 2021/11/6 |
|          | <i>Pagrosomus major</i>     | 2 pieces | 50   | Guangdong | Shanghai | 2021/11/6 |
|          | <i>Scophthalmus maximus</i> | 2 pieces | 50   | Shandong  | Shanghai | 2021/11/6 |
|          | <i>Acipensersinensis</i>    | 2 pieces | 200  | Jiangsu   | Shanghai | 2021/11/6 |

**Table S2 The 2021 Transportation Water Sample Sampling Record Form**

| Sampling Month | Name                           | Sampling Amount | Base (ton) | Place of origin | Sampling area | Sampling date |
|----------------|--------------------------------|-----------------|------------|-----------------|---------------|---------------|
| June           | <i>Ophiocephalus argus</i>     | 600mL           | 1          | Zhejiang        | Shanghai      | 2021/6/16     |
|                | <i>Mugil cephalus</i>          | 600mL           | 1          | Jiangsu         | Shanghai      | 2021/6/16     |
|                | <i>Oreochromis spp</i>         | 600mL           | 1          | Jiangsu         | Shanghai      | 2021/6/16     |
| July           | <i>Lateolabrax japonicus</i>   | 600mL           | 1          | Fujian          | Fujian        | 2021/7/13     |
|                | <i>Penaeus chinensis</i>       | 600mL           | 1          | Fujian          | Fujian        | 2021/7/13     |
|                | <i>Scophthalmus maximus</i>    | 600mL           | 1          | Shandong        | Fujian        | 2021/7/13     |
|                | <i>Ophiocephalus argus</i>     | 600mL           | 1          | Jiangsu         | Shanghai      | 2021/7/16     |
|                | <i>Carassius aumtus</i>        | 600mL           | 1          | Shandong        | Shanghai      | 2021/7/16     |
|                |                                |                 |            |                 |               |               |
| August         | <i>Lateolabrax japonicus</i>   | 600mL           | 1          | Fujian          | Fujian        | 2021/8/9      |
|                | <i>Thalassoma bifasciatum</i>  | 600mL           | 1          | Fujian          | Fujian        | 2021/8/9      |
|                | <i>Ophiocephalus argus</i>     | 600mL           | 1          | Anhui           | Shanghai      | 2021/8/12     |
|                | <i>Pseudobagrus fulvidraco</i> | 600mL           | 1          | Jiangsu         | Shanghai      | 2021/8/12     |
|                | <i>Scophthalmus maximus</i>    | 600mL           | 1          | Shandong        | Shanghai      | 2021/8/12     |
|                | <i>Penaeus chinensis</i>       | 601mL           | 1          | Shanghai        | Shanghai      | 2021/8/12     |
| November       | <i>Ophiocephalus argus</i>     | 600mL           | 1          | Anhui           | Shanghai      | 2021/11/6     |

|  |                          |       |   |          |          |           |
|--|--------------------------|-------|---|----------|----------|-----------|
|  | <i>Epinephelus</i>       | 600mL | 1 | Jiangsu  | Shanghai | 2021/11/6 |
|  | <i>Penaeus chinensis</i> | 600mL | 1 | Shanghai | Shanghai | 2021/11/6 |

**Table S3 The 2021 Temporary Water Samples Sampling Record Form**

| Sampling month | Name                         | Sampling amount (mL) | Base (ton) | Place of origin | Sampling area | Sampling date |
|----------------|------------------------------|----------------------|------------|-----------------|---------------|---------------|
| June           | <i>Scophthalmus maximus</i>  |                      |            |                 |               |               |
|                | <i>Lateolabrax japonicus</i> | 600                  | 1          | Shanghai        | Shanghai      | 2021/6/16     |
|                | <i>Siniperca chuatsi</i>     |                      |            |                 |               |               |
|                | <i>Acipenser sinensis</i>    | 600                  | 1          | Shanghai        | Shanghai      | 2021/6/16     |
|                | <i>Epinephelus</i>           |                      |            |                 |               |               |
|                | <i>Pagrosomus major</i>      | 600                  | 1          | Fujian          | Fujian        | 2021/7/13     |
| July           | <i>Lateolabrax japonicus</i> |                      |            |                 |               |               |
|                | <i>Epinephelus</i>           |                      |            |                 |               |               |
|                | <i>Scophthalmus maximus</i>  | 600                  | 1          | Zhejiang        | Zhejiang      | 2021/7/15     |
|                | <i>Pampus sinensis</i>       |                      |            |                 |               |               |
|                | <i>Acipenser sinensis</i>    |                      |            |                 |               |               |
|                | <i>Scophthalmus maximus</i>  | 600                  | 1          | Shanghai        | Shanghai      | 2021/7/16     |
| August         | <i>Epinephelus</i>           |                      |            |                 |               |               |
|                | <i>Siniperca chuatsi</i>     | 600                  | 1          | Shanghai        | Shanghai      | 2021/7/16     |
|                | <i>Scophthalmus maximus</i>  | 600                  | 1          | Fujian          | Fujian        | 2021/8/9      |
|                | <i>Siniperca chuatsi</i>     | 600                  | 2          | Fujian          | Fujian        | 2021/8/9      |
|                | <i>Lateolabrax japonicus</i> |                      |            |                 |               |               |
|                | <i>Acipenser sinensis</i>    |                      |            |                 |               |               |
|                | <i>Scophthalmus maximus</i>  | 600                  | 2          | Zhejiang        | Zhejiang      | 2021/8/11     |
|                | <i>Pagrosomus major</i>      |                      |            |                 |               |               |
|                | <i>Siniperca chuatsi</i>     | 600                  | 2          | Zhejiang        | Zhejiang      | 2021/8/11     |
|                | <i>Epinephelus</i>           | 600                  | 2          | Shanghai        | Shanghai      | 2021/8/12     |
|                | <i>Siniperca chuatsi</i>     |                      |            |                 |               |               |
|                | <i>Scophthalmus maximus</i>  | 600                  | 2          | Shanghai        | Shanghai      | 2021/8/12     |

|          |                          |     |   |          |          |           |
|----------|--------------------------|-----|---|----------|----------|-----------|
|          | <i>Siniperca chuatsi</i> | 600 | 2 | Shanghai | Shanghai | 2021/8/12 |
| November | <i>Siniperca chuatsi</i> | 600 | 1 | Shanghai | Shanghai | 2021/11/6 |
|          | <i>Pagrosomus</i>        | 600 | 1 | Shanghai | Shanghai | 2021/11/6 |
|          | <i>major</i>             |     |   |          |          |           |

**Table S4 Sampling Record Table for April 2022**

| Name                               | Sampling amount | Base (pieces) | Weight (kg) | Place of origin            | Sampling area | Sampling date |
|------------------------------------|-----------------|---------------|-------------|----------------------------|---------------|---------------|
| <i>Erythroculter ilishaeformis</i> | 2               | 200           | 1.5         | Shanghai                   | Shanghai      | 2022/4/15     |
| <i>Lateolabrax japonicus</i>       | 2               | 400           | 2           | Shanghai                   | Shanghai      | 2022/4/15     |
| <i>Pseudobagrus fulvidraco</i>     | 5               | 800           | 2.1         | Zhejiang                   | Shanghai      | 2022/4/15     |
| <i>Ophiocephalus argus</i>         | 1               | 300           | 0.9         | Shanghai                   | Shanghai      | 2022/4/15     |
| <i>Carassius aumtus</i>            | 2               | 500           | 3           | Shanghai                   | Shanghai      | 2022/4/15     |
| <i>Scophthalmus maximus</i>        | 2               | 200           | 2.5         | Shandong                   | Shanghai      | 2022/4/15     |
| <i>Leiocassis longirostris</i>     | 2               | 200           | 1.7         | Jiangsu                    | Shanghai      | 2022/4/15     |
| <i>Oreochromis spp</i>             | 2               | 100           | 2.2         | Jiangsu                    | Shanghai      | 2022/4/15     |
| <i>Lateolabrax japonicus</i>       | 1               | 200           | 2.5         | Shanghai                   | Shanghai      | 2022/4/15     |
| <i>Siniperca chuatsi</i>           | 2               | 200           | 2.9         | Guangzhou                  | Shanghai      | 2022/4/15     |
| <i>Ophiocephalus argus</i>         | 2               | 400           | 3.3         | Anhui                      | Shanghai      | 2022/4/15     |
| <i>Carassius aumtus</i>            | 6               | 1000          | 4           | Dianshan Lake, Shanghai    | Shanghai      | 2022/4/16     |
| <i>Hypophthalmichthys molitrix</i> | 2               | 500           | 5           | Shanghai                   | Shanghai      | 2022/4/16     |
| <i>Carassius aumtus</i>            | 4               | 1000          | 3.5         | Chongming Island, Shanghai | Shanghai      | 2022/4/16     |
| <i>Ctenopharyngodon idellus</i>    | 2               | 300           | 4.5         | Sheyang, Jiangsu           | Shanghai      | 2022/4/16     |
| <i>Pampus sinensis</i>             | 2               | 100           | 2.5         | Fujian                     | Fujian        | 2022/4/16     |
| <i>Scophthalmus maximus</i>        | 2               | 200           | 3.0         | Shandong                   | Fujian        | 2022/4/16     |
| <i>Epinephelus</i>                 | 2               | 200           | 3.1         | Fujian                     | Fujian        | 2022/4/16     |
| <i>Siniperca chuatsi</i>           | 2               | 100           | 3.5         | Guangdong                  | Fujian        | 2022/4/16     |
| <i>Pseudobagrus fulvidraco</i>     | 4               | 200           | 2.5         | Fujian                     | Fujian        | 2022/4/16     |

|                                   |    |     |      |               |          |           |
|-----------------------------------|----|-----|------|---------------|----------|-----------|
| <i>Lateolabrax japonicus</i>      | 2  | 100 | 2    | Guangdong     | Fujian   | 2022/4/16 |
| <i>Ophiocephalus argus</i>        | 1  | 50  | 1.8  | Jiangxi       | Fujian   | 2022/4/16 |
| <i>Siniperca chuatsi</i>          | 2  | 200 | 2.6  | Guangdong     | Fujian   | 2022/4/16 |
| <i>Scophthalmus maximus</i>       | 2  | 200 | 3    | Fujian        | Fujian   | 2022/4/16 |
| <i>Epinephelus</i> sp             | 2  | 200 | 2.1  | Hainan        | Fujian   | 2022/4/16 |
| <i>Pagrosomus major</i>           | 2  | 50  | 2    | Ningde,Fujian | Fujian   | 2022/4/16 |
| <i>Megalobrama amblycephala</i>   | 2  | 100 | 2.5  | Fujian        | Fujian   | 2022/4/16 |
| <i>Pseudobagrus fulvidraco</i>    | 4  | 50  | 2.2  | Fujian        | Fujian   | 2022/4/16 |
| <i>Ctenopharyngodon idellus</i>   | 1  | 100 | 2    | Fujian        | Fujian   | 2022/4/16 |
| <i>Carassius aumtus</i>           | 4  | 500 | 2.3  | Jiangsu       | Fujian   | 2022/4/16 |
| <i>Hypophthalmichthys nobilis</i> | 1  |     | 2.4  | Huzhou        | Zhejiang | 2022/4/16 |
| <i>Siniperca chuatsi</i>          | 2  |     | 1.3  | Fujian        | Zhejiang | 2022/4/16 |
| <i>Carassius aumtus</i>           | 2  |     | 1.5  | Huzhou        | Zhejiang | 2022/4/16 |
| <i>Megalobrama amblycephala</i>   | 2  |     | 1.4  | Huzhou        | Zhejiang | 2022/4/16 |
| <i>Lateolabrax japonicus</i>      | 2  |     | 1.25 | Huzhou        | Zhejiang | 2022/4/16 |
| <i>Scophthalmus maximus</i>       | 2  |     | 1.1  | Shandong      | Zhejiang | 2022/4/16 |
| <i>Pagrosomus major</i>           | 2  |     | 0.85 | Fujian        | Zhejiang | 2022/4/16 |
| <i>Lateolabrax japonicus</i>      | 2  |     | 1.3  | Fujian        | Zhejiang | 2022/4/16 |
| <i>Scophthalmus maximus</i>       | 2  |     | 1.35 | Shandong      | Zhejiang | 2022/4/16 |
| <i>Ophiocephalus argus</i>        | 6  |     | 2.2  | Guangdong     | Zhejiang | 2022/4/16 |
| <i>Hypophthalmichthys nobilis</i> | 2  |     | 7    | Huzhou        | Zhejiang | 2022/4/16 |
| <i>Carassius aumtus</i>           | 12 |     | 1.35 | Huzhou        | Zhejiang | 2022/4/16 |
| <i>Carassius aumtus</i>           | 8  |     | 0.3  | Huzhou        | Zhejiang | 2022/4/16 |
| <i>Ophiocephalus argus</i>        | 2  |     | 0.8  | Guangdong     | Zhejiang | 2022/4/17 |
| <i>Lateolabrax japonicus</i>      | 2  |     | 1.5  | Guangzhou     | Zhejiang | 2022/4/17 |
| <i>Cyprinus carpio</i>            | 2  |     | 5    | Qiandao Lake  | Zhejiang | 2022/4/17 |
| <i>Megalobrama amblycephala</i>   | 2  |     | 6    | Qiandao Lake  | Zhejiang | 2022/4/17 |

Table S5 Sampling Record Table for May 2022

| Name                                  | Amount | Base<br>(pieces) | Weight<br>(kg) | Place of origin | Sampling<br>area | Sampling<br>date |
|---------------------------------------|--------|------------------|----------------|-----------------|------------------|------------------|
| <i>Pseudobagrus<br/>fulvidraco</i>    | 8      | 1000             | 2.05           | Shanghai        | Shanghai         | 2022/5/18        |
| <i>Mugil cephalus</i>                 | 2      | 50               | 2.09           | Shanghai        | Shanghai         | 2022/5/18        |
| <i>Ophiocephalus argus</i>            | 2      | 100              | 2              | Zhejiang        | Shanghai         | 2022/5/18        |
| <i>Penaeus monodon</i>                | 30     | 1000             | 1.05           | Shanghai        | Shanghai         | 2022/5/18        |
| <i>Scophthalmus<br/>maximus</i>       | 3      | 50               | 2.15           | Shandong        | Shanghai         | 2022/5/18        |
| <i>Siniperca chuatsi</i>              | 2      | 100              | 1.9            | Guangzhou       | Shanghai         | 2022/5/18        |
| <i>Lateolabrax<br/>japonicus</i>      | 2      | 100              | 2.04           | Guangzhou       | Shanghai         | 2022/5/18        |
| <i>Epinephelus</i>                    | 2      | 100              | 1.65           | Fujian          | Shanghai         | 2022/5/18        |
| <i>Ictalurus Punctatus</i>            | 2      | 100              | 2              | Jiangsu         | Shanghai         | 2022/5/18        |
| <i>Megalobrama<br/>amblycephala</i>   | 2      | 100              | 2.01           | Shanghai        | Shanghai         | 2022/5/18        |
| <i>Ctenopharyngodon<br/>idellus</i>   | 2      | 100              | 1.9            | Shanghai        | Shanghai         | 2022/5/19        |
| <i>Hypophthalmichthys<br/>nobilis</i> | 2      | 100              | 2.25           | Shanghai        | Shanghai         | 2022/5/19        |
| <i>Pseudobagrus<br/>fulvidraco</i>    | 8      | 1000             | 2.3            | Shanghai        | Shanghai         | 2022/5/19        |
| <i>Lateolabrax<br/>japonicus</i>      | 2      | 100              | 2.1            | Guangzhou       | Shanghai         | 2022/5/19        |
| <i>Ophiocephalus argus</i>            | 2      | 50               | 2.3            | Shanghai        | Shanghai         | 2022/5/19        |
| <i>Carassius auratus</i>              | 2      | 1000             | 1.5            | Jiangsu         | Zhejiang         | 2022/5/18        |
| <i>Megalobrama<br/>amblycephala</i>   | 1      | 2000             | 2              | Jiangxi         | Zhejiang         | 2022/5/18        |
| <i>Ctenopharyngodon<br/>idellus</i>   | 1      | 300              | 3              | Jiangsu         | Zhejiang         | 2022/5/18        |
| <i>Lateolabrax<br/>japonicus</i>      | 2      | 200              | 2.5            | Zhejiang        | Zhejiang         | 2022/5/18        |
| <i>Carassius auratus</i>              | 2      | 3000             | 1.5            | Jiangsu         | Zhejiang         | 2022/5/18        |
| <i>Hypophthalmichthys<br/>nobilis</i> | 1      | 400              | 3              | Anhui           | Zhejiang         | 2022/5/18        |
| <i>Megalobrama<br/>amblycephala</i>   | 1      | 1000             | 2              | Zhejiang        | Zhejiang         | 2022/5/18        |
| <i>Ophiocephalus argus</i>            | 1      | 300              | 2              | Shanghai        | Zhejiang         | 2022/5/18        |
| <i>Ophiocephalus argus</i>            | 1      | 100              | 3              | Zhejiang        | Zhejiang         | 2022/5/18        |
| <i>Carassius auratus</i>              | 2      | 3000             | 2              | Jiangsu         | Zhejiang         | 2022/5/18        |
| <i>Ophiocephalus argus</i>            | 1      | 100              | 2              | Zhejiang        | Zhejiang         | 2022/5/18        |
| <i>Pseudobagrus</i>                   | 7      | 1000             | 3              | Anhui           | Zhejiang         | 2022/5/19        |

|                                        |    |       |      |          |          |           |
|----------------------------------------|----|-------|------|----------|----------|-----------|
| <i>fulvidraco</i>                      |    |       |      |          |          |           |
| <i>Ophiocephalus argus</i>             | 1  | 2000  | 2    | Anhui    | Zhejiang | 2022/5/19 |
| <i>Oreochromis spp</i>                 | 1  | 1000  | 2    | Zhejiang | Zhejiang | 2022/5/19 |
| <i>Megalobrama<br/>amblycephala</i>    | 1  | 20    | 1.5  | Zhejiang | Zhejiang | 2022/5/19 |
| <i>Lateolabrax<br/>japonicus</i>       | 2  | 1000  | 0.85 | Fujian   | Fujian   | 2022/5/18 |
| <i>Pampus sinensis</i>                 | 3  | 500   | 1.55 | Fujian   | Fujian   | 2022/5/18 |
| <i>Pagrosomus major</i>                | 4  | 2000  | 1.36 | Fujian   | Fujian   | 2022/5/18 |
| <i>Penaeus vannamei</i>                | 50 | 10000 | 1.25 | Fujian   | Fujian   | 2022/5/18 |
| <i>Larimichthys crocea</i>             | 1  | 200   | 1.45 | Ningde   | Fujian   | 2022/5/18 |
| <i>Larimichthys crocea</i>             | 2  | 1000  | 1.68 | Ningde   | Fujian   | 2022/5/19 |
| <i>Scophthalmus<br/>maximus</i>        | 2  | 200   | 1.44 | Shandong | Fujian   | 2022/5/19 |
| <i>Megalobrama<br/>amblycephala</i>    | 2  | 2000  | 1.31 | Fujian   | Fujian   | 2022/5/19 |
| <i>Lateolabrax<br/>japonicus</i>       | 2  | 1000  | 0.85 | Fujian   | Fujian   | 2022/5/19 |
| <i>Siniperca chuatsi</i>               | 2  | 500   | 1.35 | Fujian   | Fujian   | 2022/5/19 |
| <i>Pseudobagrus<br/>fulvidraco</i>     | 4  | 2000  | 1.05 | Fujian   | Fujian   | 2022/5/19 |
| <i>Hypophthalmichthys<br/>nobilis</i>  | 2  | 2000  | 2.5  | Fujian   | Fujian   | 2022/5/20 |
| <i>Hypophthalmichthys<br/>molitrix</i> | 2  | 2000  | 2.3  | Fujian   | Fujian   | 2022/5/20 |
| <i>Ctenopharyngodon<br/>idellus</i>    | 2  | 1500  | 2.4  | Fujian   | Fujian   | 2022/5/20 |
| <i>Carassius aumtus</i>                | 4  | 5000  | 1.3  | Fujian   | Fujian   | 2022/5/20 |

Table S6 Sampling Record Table for May 2022

| Name                                   | Amount | Base<br>(pieces) | Weight<br>(kg) | Place of origin | Sampling<br>area | Sampling<br>date |
|----------------------------------------|--------|------------------|----------------|-----------------|------------------|------------------|
| <i>Hypophthalmichthys<br/>molitrix</i> | 1      | 1000             | 1.5            | Jiangsu         | Shanghai         | 2022/6/17        |
| <i>opharyngodon idellus</i>            | 1      | 500              | 3              | Jiangsu         | Shanghai         | 2022/6/17        |
| <i>Hypophthalmichthys<br/>nobilis</i>  | 1      | 2000             | 3.5            | Qiandao Lake    | Shanghai         | 2022/6/17        |
| <i>Carassius aumtus</i>                | 2      | 2000             | 0.75           | Qiandao Lake    | Shanghai         | 2022/6/17        |
| <i>Ophiocephalus argus</i>             | 2      | 1000             | 0.8            | Guangdong       | Shanghai         | 2022/6/17        |
| <i>Scophthalmus<br/>maximus</i>        | 2      | 5000             | 1.15           | Shandong        | Shanghai         | 2022/6/18        |
| <i>Siniperca chuatsi</i>               | 2      | 500              | 1.35           | Zhejiang        | Shanghai         | 2022/6/18        |
| <i>Pseudobagrus<br/>fulvidraco</i>     | 4      | 2000             | 0.65           | Shanghai        | Shanghai         | 2022/6/18        |



|                                   |   |      |      |               |          |           |
|-----------------------------------|---|------|------|---------------|----------|-----------|
| <i>Mugil cephalus</i>             | 3 | 1000 | 1.5  | Zhejiang      | Shanghai | 2022/6/18 |
| <i>Ophiocephalus argus</i>        | 2 | 500  | 2.4  | Zhejiang      | Shanghai | 2022/6/18 |
| <i>Pampus sinensis</i>            | 2 | 200  | 1.35 | Fujian        | Shanghai | 2022/6/18 |
| <i>Epinephelus</i>                | 2 | 200  | 1.35 | Fujian        | Shanghai | 2022/6/18 |
| <i>Carassius aumtus</i>           | 2 | 200  | 1.5  | Shanghai      | Shanghai | 2022/6/18 |
| <i>Megalobrama amblycephala</i>   | 2 | 200  | 1.5  | Qianddao Lake | Shanghai | 2022/6/18 |
| <i>Lateolabrax japonicus</i>      | 2 | 5000 | 1.2  | Sanghai       | Shanghai | 2022/6/18 |
| <i>Ctenopharyngodon idellus</i>   | 1 | 800  | 2    | Jiangsu       | Zhejiang | 2015/6/17 |
| <i>Hypophthalmichthys nobilis</i> | 1 | 2000 | 1.9  | Jiangsu       | Zhejiang | 2015/6/17 |
| <i>Hypophthalmichthys nobilis</i> | 1 | 1000 | 2.6  | Jiangxi       | Zhejiang | 2015/6/17 |
| <i>Scophthalmus maximus</i>       | 2 | 2000 | 3    | Jiangsu       | Zhejiang | 2022/6/18 |
| <i>Siniperca chuatsi</i>          | 1 | 200  | 1.5  | Zhejiang      | Zhejiang | 2022/6/18 |
| <i>Lateolabrax japonicus</i>      | 1 | 500  | 1.6  | Zhejiang      | Zhejiang | 2022/6/18 |
| <i>Carassius aumtus</i>           | 2 | 1000 | 2.1  | Zhejiang      | Zhejiang | 2022/6/18 |
| <i>Ctenopharyngodon idellus</i>   | 1 | 300  | 3    | Zhejiang      | Zhejiang | 2022/6/18 |
| <i>Ophiocephalus argus</i>        | 1 | 200  | 4    | Zhejiang      | Zhejiang | 2022/6/18 |
| <i>Hypophthalmichthys nobilis</i> | 1 | 1000 | 1.9  | Jiangxi       | Zhejiang | 2022/6/18 |
| <i>Ophiocephalus argus</i>        | 1 | 1000 | 2.6  | Zhejiang      | Zhejiang | 2022/6/18 |
| <i>Sciaemops Ocellatus</i>        | 2 | 2000 | 1.7  | Fujian        | Zhejiang | 2022/6/19 |
| <i>Siniperca chuatsi</i>          | 1 | 1000 | 2.2  | Zhejiang      | Zhejiang | 2022/6/19 |
| <i>Pseudobagrus fulvidraco</i>    | 8 | 4000 | 2.5  | Zhejiang      | Zhejiang | 2022/6/19 |
| <i>Larimichthys crocea</i>        | 1 | 800  | 1.8  | Fujian        | Zhejiang | 2022/6/19 |
| <i>Scophthalmus maximus</i>       | 3 | 1000 | 1.5  | Shandong      | Fujian   | 2022/6/16 |
| <i>Mugil cephalus</i>             | 2 | 200  | 2.8  | Fujian        | Fujian   | 2022/6/16 |
| <i>Ophiocephalus argus</i>        | 2 | 2000 | 3.1  | Foshan        | Fujian   | 2022/6/16 |
| <i>Siniperca chuatsi</i>          | 2 | 1000 | 2.9  | Fujian        | Fujian   | 2022/6/16 |
| <i>Lateolabrax japonicus</i>      | 3 | 500  | 2.8  | Fujian        | Fujian   | 2022/6/16 |
| <i>Megalobrama amblycephala</i>   | 1 | 2000 | 2.4  | Fujian        | Fujian   | 2022/6/16 |
| <i>Carassius aumtus</i>           | 3 | 2000 | 2    | Fujian        | Fujian   | 2022/6/16 |
| <i>Siniperca chuatsi</i>          | 2 | 1000 | 2.4  | Guangzhou     | Fujian   | 2022/6/17 |

|                                 |   |       |     |           |        |           |
|---------------------------------|---|-------|-----|-----------|--------|-----------|
| <i>Pseudobagrus fulvidraco</i>  | 4 | 500   | 1.9 | Guangzhou | Fujian | 2022/6/17 |
| <i>Lateolabrax japonicus</i>    | 3 | 2000  | 2.1 | Guangzhou | Fujian | 2022/6/17 |
| <i>Megalobrama amblycephala</i> | 2 | 10000 | 2.9 | Guangzhou | Fujian | 2022/6/17 |
| <i>Scophthalmus maximus</i>     | 1 | 200   | 1.1 | Xiamen    | Fujian | 2022/6/17 |
| <i>Cyprinus carpio</i>          | 3 | 400   | 1.4 | Shandong  | Fujian | 2022/6/17 |
| <i>Leiocassis longirostris</i>  | 1 | 1000  | 2   | Shandong  | Fujian | 2022/6/17 |
| <i>Acipensersinensis</i>        | 1 | 500   | 1.5 | Nanning   | Fujian | 2022/6/17 |

Table S7 Sampling Record Table for July 2022

| Name                              | Amount | Base      | Weight (kg) | Place of origin | Sampling area | Sampling date |
|-----------------------------------|--------|-----------|-------------|-----------------|---------------|---------------|
| <i>Scophthalmus maximus</i>       | 2      | 500       | 1.35        | Shandong        | Shanghai      | 2022/7/13     |
| <i>Epinephelus</i>                | 2      | 200       | 1.25        | Guangdong       | Shanghai      | 2022/7/13     |
| <i>Megalobrama amblycephala</i>   | 2      | 200       | 1.9         | Suzhou          | Shanghai      | 2022/7/13     |
| <i>Siniperca chuatsi</i>          | 2      | 500       | 1.25        | Fujian          | Shanghai      | 2022/7/13     |
| <i>Ophiocephalus argus</i>        | 1      | 1000      | 2.4         | Guangdong       | Shanghai      | 2022/7/13     |
| <i>Mugil cephalus</i>             | 3      | 2000      | 2.1         | Zhejiang        | Shanghai      | 2022/7/13     |
| <i>Carassius aumtus</i>           | 2      | 300       | 1.35        | Qiandao Lake    | Shanghai      | 2022/7/13     |
| <i>Hypophthalmichthys nobilis</i> | 1      | 200       | 2.5         | Qiandao Lake    | Shanghai      | 2022/7/13     |
| <i>Pagrosomus major</i>           | 2      | 200       | 1.4         | Fujian          | Shanghai      | 2022/7/13     |
| <i>Pampus sinensis</i>            | 2      | 100       | 1.1         | Zhejiang        | Shanghai      | 2022/7/13     |
| <i>Hypophthalmichthys nobilis</i> | 1      | 100       | 2.2         | Qiandao Lake    | Shanghai      | 2022/7/14     |
| <i>Ctenopharyngodon idellus</i>   | 1      | 100       | 1.5         | Jiangsu         | Shanghai      | 2022/7/14     |
| <i>Carassius aumtus</i>           | 4      | 500       | 1.5         | Shanghai        | Shanghai      | 2022/7/14     |
| <i>Siniperca chuatsi</i>          | 2      | 200       | 1.5         | Jiangsu         | Shanghai      | 2022/7/14     |
| <i>Lateolabrax japonicus</i>      | 2      | 200       | 1.1         | Zhejiang        | Shanghai      | 2022/7/14     |
| <i>Carassius aumtus</i>           | 2      | 100pieces | 1.2         | Jiangsu         | Zhejiang      | 2022/7/13     |
| <i>Siniperca chuatsi</i>          | 1      | 100pieces | 0.9         | Guangdong       | Zhejiang      | 2022/7/13     |
| <i>Ophiocephalus argus</i>        | 1      | 200pieces | 1.5         | Jiangsu         | Zhejiang      | 2022/7/13     |
| <i>Lateolabrax japonicus</i>      | 2      | 200pieces | 1.2         | Zhejiang        | Zhejiang      | 2022/7/13     |
| <i>Mugil cephalus</i>             | 2      | 100pieces | 1           | Zhejiang        | Zhejiang      | 2022/7/13     |

|                                   |   |           |     |           |          |           |
|-----------------------------------|---|-----------|-----|-----------|----------|-----------|
| <i>Hypophthalmichthys nobilis</i> | 1 | 100pieces | 1.6 | Zhejiang  | Zhejiang | 2022/7/13 |
| <i>Pseudobagrus fulvidraco</i>    | 4 | 100pieces | 1.3 | Jiangsu   | Zhejiang | 2022/7/13 |
| <i>Siniperca chuatsi</i>          | 1 | 50pieces  | 0.8 | Guangdong | Zhejiang | 2022/7/14 |
| <i>Epinephelus</i>                | 2 | 100pieces | 1.1 | Guangdong | Zhejiang | 2022/7/14 |
| <i>Megalobrama amblycephala</i>   | 1 | 50pieces  | 1.2 | Jiangsu   | Zhejiang | 2022/7/14 |
| <i>Carassius aumtus</i>           | 2 | 100pieces | 1.2 | Zhejiang  | Zhejiang | 2022/7/14 |
| <i>Scophthalmus maximus</i>       | 2 | 100pieces | 1.4 | Fujian    | Zhejiang | 2022/7/14 |
| <i>Lateolabrax japonicus</i>      | 2 | 100pieces | 1.5 | Zhejiang  | Zhejiang | 2022/7/14 |
| <i>Lateolabrax japonicus</i>      | 2 | 100pieces | 1.4 | Zhejiang  | Zhejiang | 2022/7/14 |
| <i>Pagrosomus major</i>           | 2 | 100pieces | 1.3 | Fujian    | Zhejiang | 2022/7/14 |
| <i>Epinephelus</i>                | 1 | 1000      | 1.5 | Fujian    | Fujian   | 2022/7/9  |
| <i>Pagrosomus major</i>           | 3 | 2000      | 1.9 | Fujian    | Fujian   | 2022/7/9  |
| <i>Epinephelus</i>                | 1 | 20        | 1.3 | Fujian    | Fujian   | 2022/7/9  |
| <i>Larimichthys crocea</i>        | 2 | 400       | 2.2 | Fujian    | Fujian   | 2022/7/9  |
| <i>Scophthalmus maximus</i>       | 2 | 3000      | 2.5 | Shandong  | Fujian   | 2022/7/9  |
| <i>Lateolabrax japonicus</i>      | 2 | 1000      | 0.9 | Fujian    | Fujian   | 2022/7/9  |
| <i>Epinephelus</i>                | 1 | 800       | 1.2 | Fujian    | Fujian   | 2022/7/10 |
| <i>Scophthalmus maximus</i>       | 2 | 400       | 1.5 | Fujian    | Fujian   | 2022/7/10 |
| <i>Scophthalmus maximus</i>       | 2 | 3000      | 1.6 | Shandong  | Fujian   | 2022/7/10 |
| <i>Scophthalmus maximus</i>       | 2 | 2000      | 1.3 | Shandong  | Fujian   | 2022/7/10 |
| <i>Megalobrama amblycephala</i>   | 2 | 1000      | 1.3 | Fujian    | Fujian   | 2022/7/10 |

Table S8 Sampling Record Table for August 2022

| Name                            | Amount | Base | Weight (kg) | Place of origin | Sampling area | Sampling date |
|---------------------------------|--------|------|-------------|-----------------|---------------|---------------|
| <i>Lateolabrax japonicus</i>    | 2      | 2000 | 0.9         | Shanghai        | Shanghai      | 2022/8/19     |
| <i>Megalobrama amblycephala</i> | 1      | 1000 | 1.2         | Jiangsu         | Shanghai      | 2022/8/19     |
| <i>Carassius aumtus</i>         | 2      | 2000 | 1.1         | Zhejiang        | Shanghai      | 2022/8/19     |

|                                   |    |       |      |           |          |           |
|-----------------------------------|----|-------|------|-----------|----------|-----------|
| <i>Hypophthalmichthys nobilis</i> | 1  | 2000  | 1.5  | Jiangsu   | Shanghai | 2022/8/19 |
| <i>Ophiocephalus argus</i>        | 1  | 2000  | 0.8  | Shandong  | Shanghai | 2022/8/19 |
| <i>Pseudobagrus fulvidraco</i>    | 4  | 2000  | 1.3  | Anhui     | Shanghai | 2022/8/19 |
| <i>Pseudobagrus fulvidraco</i>    | 4  | 2000  | 1.2  | Jiangsu   | Shanghai | 2022/8/19 |
| <i>Siniperca chuatsi</i>          | 2  | 2000  | 1    | Guangdong | Shanghai | 2022/8/20 |
| <i>Lateolabrax japonicus</i>      | 2  | 1     | 1.2  | Shanghai  | Shanghai | 2022/8/20 |
| <i>Scophthalmus maximus</i>       | 2  | 1     | 1    | Fujian    | Shanghai | 2022/8/20 |
| <i>Larimichthys crocea</i>        | 3  | 1000  | 1.5  | Fujian    | Zhejiang | 2022/8/19 |
| <i>Carassius aumtus</i>           | 3  | 2000  | 0.9  | Jiangsu   | Zhejiang | 2022/8/19 |
| <i>Larimichthys crocea</i>        | 2  | 200   | 1.2  | Fujian    | Zhejiang | 2022/8/19 |
| <i>Ctenopharyngodon idellus</i>   | 1  | 200   | 1.5  | Zhejiang  | Zhejiang | 2022/8/19 |
| <i>Lateolabrax japonicus</i>      | 3  | 4000  | 1.7  | Zhejiang  | Zhejiang | 2022/8/20 |
| <i>Scophthalmus maximus</i>       | 2  | 200   | 0.8  | Shandong  | Zhejiang | 2022/8/20 |
| <i>Ctenopharyngodon idellus</i>   | 2  | 400   | 2    | Jiangxi   | Zhejiang | 2022/8/20 |
| <i>Hypophthalmichthys nobilis</i> | 1  | 2000  | 1.4  | Jiangxi   | Zhejiang | 2022/8/20 |
| <i>Hypophthalmichthys nobilis</i> | 1  | 2000  | 1.8  | Jiangsu   | Zhejiang | 2022/8/20 |
| <i>Ophiocephalus argus</i>        | 1  | 3000  | 2.1  | Zhejiang  | Zhejiang | 2022/8/20 |
| <i>Ophiocephalus argus</i>        | 1  | 1000  | 1.8  | Zhejiang  | Zhejiang | 2022/8/20 |
| <i>Epinephelus</i>                | 2  | 3000  | 1.3  | Shandong  | Zhejiang | 2022/8/21 |
| <i>Epinephelus</i>                | 2  | 1000  | 1.3  | Fujian    | Fujian   | 2022/8/18 |
| <i>Penaeus monodon</i>            | 50 | 20000 | 1.25 | Fujian    | Fujian   | 2022/8/18 |
| <i>Carassius aumtus</i>           | 8  | 5000  | 1.9  | Fujian    | Fujian   | 2022/8/19 |
| <i>Hypophthalmichthys nobilis</i> | 2  | 1000  | 1.25 | Fujian    | Fujian   | 2022/8/19 |
| <i>Ctenopharyngodon idellus</i>   | 2  | 1000  | 2.4  | Fujian    | Fujian   | 2022/8/19 |
| <i>Epinephelus</i>                | 2  | 1000  | 1.45 | Fujian    | Fujian   | 2022/8/20 |
| <i>Sciaenops ocellatus</i>        | 2  | 500   | 2.05 | Fujian    | Fujian   | 2022/8/20 |
| <i>Pagrosomus major</i>           | 2  | 500   | 2.5  | Fujian    | Fujian   | 2022/8/20 |
| <i>Pampus sinensis</i>            | 2  | 500   | 1.2  | Fujian    | Fujian   | 2022/8/20 |
| <i>Lateolabrax japonicus</i>      | 2  | 1000  | 2.2  | Fujian    | Fujian   | 2022/8/20 |

Table S9 Sampling Record Table for September 2022

| Name                                        | Amount | Base  | Weight<br>(kg) | Place of origin | Sampling<br>area | Sampling<br>date |
|---------------------------------------------|--------|-------|----------------|-----------------|------------------|------------------|
| <i>Carassius aumtus</i>                     | 12     | 2000  | 3.2            | Shanghai        | Shanghai         | 2022/9/23        |
| <i>Pseudobagrus<br/>fulvidraco</i>          | 12     | 2000  | 2.7            | Shanghai        | Shanghai         | 2022/9/23        |
| <i>Lateolabrax<br/>japonicus</i>            | 4      | 2000  | 2.5            | Shanghai        | Shanghai         | 2022/9/23        |
| <i>Pseudobagrus<br/>fulvidraco</i>          | 13     | 2000  | 2.6            | Jiangsu         | Shanghai         | 2022/9/23        |
| <i>Pseudobagrus<br/>fulvidraco</i>          | 12     | 2000  | 2.8            | Zhejiang        | Shanghai         | 2022/9/23        |
| <i>Erythroculter<br/>ilishaeformis</i>      | 4      | 2000  | 2.9            | Zhejiang        | Shanghai         | 2022/9/23        |
| <i>Penaeus vannamei<br/>Boone</i>           | 30     | 20000 | 1.8            | Jiangsu         | Shanghai         | 2022/9/23        |
| <i>Penaeus monodon</i>                      | 40     | 20000 | 2.1            | Jiangsu         | Shanghai         | 2022/9/23        |
| <i>Ictalurus Punetaus</i>                   | 3      | 1000  | 3.5            | Anhui           | Shanghai         | 2022/9/23        |
| <i>Oxyeleotris<br/>marmorata</i>            | 2      | 500   | 1.3            | Guangdong       | Shanghai         | 2022/9/23        |
| <i>Ctenopharyngodon<br/>idellus</i>         | 2      | 1000  | 2.5            | Jiangsu         | Zhejiang         | 2022/9/23        |
| <i>Carassius aumtus</i>                     | 6      | 2000  | 2.5            | Zhejiang        | Zhejiang         | 2022/9/23        |
| <i>Hypophthalmichthys<br/>nobilis</i>       | 2      | 500   | 1.3            | Zhejiang        | Zhejiang         | 2022/9/23        |
| <i>Lateolabrax<br/>japonicus</i>            | 2      | 500   | 1.4            | Jiangsu         | Zhejiang         | 2022/9/23        |
| <i>Pagrosomus major</i>                     | 2      | 500   | 1.1            | Zhejiang        | Zhejiang         | 2022/9/23        |
| <i>Lateolabrax<br/>japonicus</i>            | 2      | 1000  | 1.5            | Zhejiang        | Zhejiang         | 2022/9/24        |
| <i>Siniperca chuatsi</i>                    | 2      | 500   | 1.45           | Zhejiang        | Zhejiang         | 2022/9/24        |
| <i>Ctenopharyngodon<br/>idellus</i>         | 2      | 200   | 2              | Jiangsu         | Zhejiang         | 2022/9/24        |
| <i>Hypophthalmichthys<br/>nobilis</i>       | 2      | 100   | 2.5            | Zhejiang        | Zhejiang         | 2022/9/24        |
| <i>Mylopharyngdon<br/>piceus Richardson</i> | 2      | 200   | 2              | Jiangsu         | Zhejiang         | 2022/9/24        |
| <i>Pseudobagrus<br/>fulvidraco</i>          | 5      | 10000 | 1.6            | Fujian          | Fujian           | 2022/9/23        |
| <i>Carassius aumtus</i>                     | 2      | 10000 | 1.2            | Fujian          | Fujian           | 2022/9/23        |
| <i>Siniperca chuatsi</i>                    | 2      | 5000  | 1.1            | Fujian          | Fujian           | 2022/9/23        |
| <i>Tinca tinca</i>                          | 2      | 10000 | 1.6            | Fujian          | Fujian           | 2022/9/23        |
| <i>Scophthalmus<br/>maximus</i>             | 2      | 10000 | 1.4            | Fujian          | Fujian           | 2022/9/23        |

|                              |   |       |     |           |        |           |
|------------------------------|---|-------|-----|-----------|--------|-----------|
| <i>Siniperca chuatsi</i>     | 2 | 5000  | 1.2 | Fujian    | Fujian | 2022/9/24 |
| <i>Scophthalmus maximus</i>  | 2 | 10000 | 1.2 | Shandong  | Fujian | 2022/9/24 |
| <i>Trachinotus ovatus</i>    | 2 | 10000 | 1.8 | Fujian    | Fujian | 2022/9/24 |
| <i>Epinephelus</i>           | 2 | 5000  | 1.1 | Fujian    | Fujian | 2022/9/24 |
| <i>Lateolabrax japonicus</i> | 2 | 10000 | 1.4 | Guangdong | Fujian | 2022/9/24 |

Table S10 Sampling Record Table for October 2022

| Name                              | Amount | Base  | Weight (kg) | Place of origin | Sampling area | Sampling date   |
|-----------------------------------|--------|-------|-------------|-----------------|---------------|-----------------|
|                                   |        |       |             |                 |               | 202             |
| <i>Macrobra'chium rosenbergii</i> | 12     | 2000  | 2.1         | Shanghai        | Shanghai      | 2/1<br>0/2<br>2 |
| <i>Pseudobagrus fulvidraco</i>    | 12     | 2000  | 3           | Zhejiang        | Shanghai      | 2022/10/22      |
| <i>Penaeus monodon</i>            | 4      | 2000  | 1.6         | Shanghai        | Shanghai      | 2022/10/22      |
| <i>Pseudobagrus fulvidraco</i>    | 13     | 2000  | 3.1         | Jiangsu         | Shanghai      | 2022/10/22      |
| <i>Lateolabrax japonicus</i>      | 12     | 2000  | 3.1         | Guangdong       | Shanghai      | 2022/10/22      |
| <i>Ophiocephalus argus</i>        | 4      | 2000  | 4.1         | Zhejiang        | Shanghai      | 2022/10/22      |
| <i>Carassius auratus</i>          | 30     | 20000 | 3.2         | Jiangsu         | Shanghai      | 2022/10/23      |
| <i>Penaeus vannamei</i>           | 40     | 20000 | 3.1         | Zhejiang        | Shanghai      | 2022/10/23      |
| <i>Cyprinus carpio</i>            | 3      | 1000  | 4.2         | Jiangsu         | Shanghai      | 2022/10/23      |
| <i>Carassius auratus</i>          | 2      | 500   | 3.5         | Jiangsu         | Shanghai      | 2022/10/23      |
| <i>Ophiocephalus argus</i>        | 1      | 10000 | 1.6         | Shandong        | Zhejiang      | 2022/10/26      |
| <i>Lateolabrax japonicus</i>      | 2      | 10000 | 1.2         | Zhejiang        | Zhejiang      | 2022/10/26      |
| <i>Pseudobagrus fulvidraco</i>    | 5      | 5000  | 1.1         | Anhui           | Zhejiang      | 2022/10/26      |
| <i>Siniperca chuatsi</i>          | 2      | 10000 | 1.6         | Guangdong       | Zhejiang      | 2022/10/26      |
| <i>Carassius auratus</i>          | 2      | 10000 | 1.4         | Zhejiang        | Zhejiang      | 2022/10/26      |
| <i>Siniperca chuatsi</i>          | 2      | 5000  | 1.2         | Guangdong       | Zhejiang      | 2022/10/26      |
| <i>Lateolabrax japonicus</i>      | 2      | 10000 | 1.2         | Zhejiang        | Zhejiang      | 2022/10/26      |
| <i>Pagrosomus major</i>           | 2      | 10000 | 1.8         | Fujian          | Zhejiang      | 2022/10/26      |
| <i>Scophthalmus maximus</i>       | 2      | 5000  | 1.1         | Fujian          | Zhejiang      | 2022/10/26      |
| <i>Hypoplectrus indigo</i>        | 2      | 10000 | 1.4         | Guangdong       | Zhejiang      | 2022/10/26      |
| <i>Epinephelus</i>                | 2      | 300   | 1.3         | Shanghai        | Fujian        | 2022/10/26      |
| <i>Sciaenops ocellatus</i>        | 2      | 500   | 2           | Jiangsu         | Fujian        | 2022/10/26      |

|                                   |    |      |     |           |        |            |
|-----------------------------------|----|------|-----|-----------|--------|------------|
| <i>Ctenopharyngodon idellus</i>   | 4  | 1000 | 3.3 | Zhejiang  | Fujian | 2022/10/27 |
| <i>Hypophthalmichthys nobilis</i> | 4  | 1000 | 3.5 | Jiangsu   | Fujian | 2022/10/27 |
| <i>Carassius aumtus</i>           | 10 | 5000 | 2.9 | Shandong  | Fujian | 2022/10/27 |
| <i>Trachinotus ovatus</i>         | 2  | 500  | 1.2 | Anhui     | Fujian | 2022/10/28 |
| <i>Lateolabrax japonicus</i>      | 2  | 500  | 1.6 | Jiangsu   | Fujian | 2022/10/28 |
| <i>Epinephelus</i>                | 2  | 1000 | 1.5 | Guangdong | Fujian | 2022/10/28 |
| <i>Pagrosomus major</i>           | 2  | 500  | 1.5 | Shanghai  | Fujian | 2022/10/28 |
| <i>Sciaenops ocellatus</i>        | 2  | 500  | 1.7 | Fujian    | Fujian | 2022/10/28 |

**Table S11 The 2022 Transportation Water Samples Sampling Record Form**

| Sampling month | Name                               | Sampling amount | Base | Place of origin            | Sampling area | Sampling date |
|----------------|------------------------------------|-----------------|------|----------------------------|---------------|---------------|
| April          | <i>Erythroculter lishaeformis</i>  | 550mL           | 1ton | Shanghai                   | Shanghai      | 2022/4/15     |
|                | <i>Lateolabrax japonicus</i>       | 550mL           | 1ton | Shanghai                   | Shanghai      | 2022/4/15     |
|                | <i>Pseudobagrus fulvidraco</i>     | 550mL           | 1ton | Zhejiang                   | Shanghai      | 2022/4/15     |
|                | <i>Ophiocephalus argus</i>         | 550mL           | 1ton | Shanghai                   | Shanghai      | 2022/4/15     |
|                | <i>Carassius aumtus</i>            | 550mL           | 1ton | Shanghai                   | Shanghai      | 2022/4/15     |
|                | <i>Scophthalmus maximus</i>        | 550mL           | 1ton | Shandong                   | Shanghai      | 2022/4/15     |
|                | <i>Leiocassis longirostris</i>     | 550mL           | 1ton | Jiangsu                    | Shanghai      | 2022/4/15     |
|                | <i>Oreochromis</i>                 | 550mL           | 1ton | Jiangsu                    | Shanghai      | 2022/4/15     |
|                | <i>Lateolabrax japonicus</i>       | 550mL           | 1ton | Shanghai                   | Shanghai      | 2022/4/15     |
|                | <i>Siniperca chuatsi</i>           | 550mL           | 1ton | Guangzhou                  | Shanghai      | 2022/4/15     |
|                | <i>Ophiocephalus argus</i>         | 550mL           | 1ton | Anhui                      | Shanghai      | 2022/4/15     |
|                | <i>Carassius aumtus</i>            | 550mL           | 1ton | Dianshan Lake, Shanghai    | Shanghai      | 2022/4/16     |
|                | <i>Hypophthalmichthys molitrix</i> | 550mL           | 1ton | Shanghai                   | Shanghai      | 2022/4/16     |
|                | <i>Carassius aumtus</i>            | 550mL           | 1ton | Chongming Island, Shanghai | Shanghai      | 2022/4/16     |
|                | <i>Ctenopharyngodon idellus</i>    | 550mL           | 1ton | Sheyang, Jiangsu           | Shanghai      | 2022/4/16     |
|                | <i>Lateolabrax japonicus</i>       | 350mL           | 1ton | Fujian                     | Fujian        | 2022/4/14     |
|                | <i>Pampus sinensis</i>             | 350mL           | 1ton | Fujian                     | Fujian        | 2022/4/14     |
|                | <i>Epinephelus</i>                 | 350mL           | 1ton | Fujian                     | Fujian        | 2022/4/14     |
|                | <i>Lateolabrax japonicus</i>       | 350mL           | 1ton | Fujian                     | Fujian        | 2022/4/14     |
|                | <i>Scophthalmus maximus</i>        | 350mL           | 1ton | Fujian                     | Fujian        | 2022/4/14     |
|                | <i>Epinephelus tauvina</i>         | 350mL           | 1ton | Fujian                     | Fujian        | 2022/4/14     |
|                | <i>Scophthalmus maximus</i>        | 350mL           | 1ton | Fujian                     | Fujian        | 2022/4/14     |
|                | <i>Scophthalmus maximus</i>        | 350mL           | 1ton | Shandong                   | Fujian        | 2022/4/14     |
|                | <i>Epinephelus</i>                 | 350mL           | 1ton | Fujian                     | Fujian        | 2022/4/16     |
| .....          | <i>Penaeus monodon Fabricius</i>   | 350mL           | 1ton | Fujian                     | Fujian        | 2022/4/16     |

|  |                                                   |       |       |           |          |           |
|--|---------------------------------------------------|-------|-------|-----------|----------|-----------|
|  | <i>Pseudobagrus fulvidraco</i>                    | 350mL | 1ton  | Fujian    | Fujian   | 2022/4/16 |
|  | <i>Siniperca chuats</i>                           | 350mL | 1ton  | Fujian    | Fujian   | 2022/4/16 |
|  | <i>Ctenopharyngodon idellus</i>                   | 350mL | 1ton  | Fujian    | Fujian   | 2022/4/16 |
|  | <i>Hypophthalmichthys nobilis</i>                 | 350mL | 1ton  | Fujian    | Fujian   | 2022/4/16 |
|  | <i>Hypophthalmichthys molitrix</i>                | 350mL | 1ton  | Fujian    | Fujian   | 2022/4/16 |
|  | <i>Penaeus monodon</i>                            | 550mL | 5ton  | Shanghai  | Shanghai | 2022/5/18 |
|  | <i>Ophiocephalus argus</i>                        | 550mL | 5ton  | Zhejiang  | Shanghai | 2022/5/18 |
|  | <i>Scophthalmus maximus</i>                       | 550mL | 5ton  | Shandong  | Shanghai | 2022/5/18 |
|  | <i>Siniperca chuatsi</i>                          | 550mL | 5ton  | Guangzhou | Shanghai | 2022/5/18 |
|  | <i>Mugil cephalus</i>                             | 550mL | 5ton  | Shanghai  | Shanghai | 2022/5/18 |
|  | <i>Pseudobagrus fulvidraco</i>                    | 550mL | 5ton  | Shanghai  | Shanghai | 2022/5/18 |
|  | <i>Carassius aumtus</i>                           | 550mL | 20ton | Jiangsu   | Zhejiang | 2022/5/18 |
|  | <i>Megalobrama amblycephala</i>                   | 550mL | 30ton | Jiangxi   | Zhejiang | 2022/5/18 |
|  | <i>Ctenopharyngodon idellus</i>                   | 550mL | 25ton | Jiangsu   | Zhejiang | 2022/5/18 |
|  | <i>Lateolabrax japonicus</i>                      | 550mL | 10ton | Zhejiang  | Zhejiang | 2022/5/18 |
|  | <i>Carassius aumtus</i>                           | 550mL | 20ton | Jiangsu   | Zhejiang | 2022/5/18 |
|  | <i>Hypophthalmichthys nobilis</i>                 | 550mL | 25ton | Anhui     | Zhejiang | 2022/5/18 |
|  | <i>Megalobrama amblycephala</i>                   | 550mL | 20ton | Zhejiang  | Zhejiang | 2022/5/18 |
|  | <i>Ophiocephalus argus</i>                        | 550mL | 20ton | Shanghai  | Zhejiang | 2022/5/18 |
|  | <i>Ophiocephalus argus</i>                        | 550mL | 20ton | Zhejiang  | Zhejiang | 2022/5/18 |
|  | <i>Carassius aumtus</i>                           | 550mL | 25ton | Jiangsu   | Zhejiang | 2022/5/18 |
|  | <i>Ophiocephalus argus</i>                        | 550mL | 20ton | Zhejiang  | Zhejiang | 2022/5/18 |
|  | <i>Pseudobagrus fulvidraco</i>                    | 550mL | 30ton | Anhui     | Zhejiang | 2022/5/19 |
|  | <i>Ophiocephalus argus</i>                        | 550mL | 20ton | Anhui     | Zhejiang | 2022/5/19 |
|  | <i>Oreochromis pp</i>                             | 550mL | 30ton | Zhejiang  | Zhejiang | 2022/5/19 |
|  | <i>Megalobrama amblycephala</i>                   | 550mL | 20ton | Zhejiang  | Zhejiang | 2022/5/19 |
|  | <i>Lateolabrax japonicus</i><br>(bottle×1)        | 550mL | 1ton  | Xiamen    | Fujian   | 2022/5/18 |
|  | <i>Pampus sinensis</i> (bottle×3)                 | 550mL | 1ton  | Xiamen    | Fujian   | 2022/5/18 |
|  | <i>Pagrosomus major</i> (bottle×5)                | 550mL | 1ton  | Xiamen    | Fujian   | 2022/5/18 |
|  | <i>Penaeus vannamei</i> (×7)                      | 550mL | 1ton  | Xiamen    | Fujian   | 2022/5/18 |
|  | <i>Larimichthys crocea</i> 105<br>(bottle×9)      | 550mL | 1ton  | Xiamen    | Fujian   | 2022/5/18 |
|  | <i>Larimichthys crocea</i> (bottle F1)            | 550mL | 2ton  | Fuzhou    | Fujian   | 2022/5/19 |
|  | <i>Megalobrama amblycephala</i><br>(bottle F4)    | 550mL | 1ton  | Fuzhou    | Fujian   | 2022/5/19 |
|  | <i>Lateolabrax japonicus</i> (bottle<br>F6)       | 550mL | 1ton  | Fuzhou    | Fujian   | 2022/5/19 |
|  | <i>Pseudobagrus fulvidraco</i> (bottle<br>F9)     | 550mL | 1ton  | Fuzhou    | Fujian   | 2022/5/19 |
|  | <i>Hypophthalmichthys nobilis</i><br>(bottle F11) | 550mL | 1ton  | Fuzhou    | Fujian   | 2022/5/20 |
|  | <i>Hypophthalmichthys molitrix</i>                | 550mL | 1ton  | Fuzhou    | Fujian   | 2022/5/20 |



|      |                                     |       |       |           |          |           |
|------|-------------------------------------|-------|-------|-----------|----------|-----------|
|      | (bottle F13)                        |       |       |           |          |           |
|      | <i>Ctenopharyngodon idellus</i>     | 550mL | 1ton  | Fuzhou    | Fujian   | 2022/5/20 |
|      | (bottle F15)                        |       |       |           |          |           |
|      | <i>Carassius aumtus</i> (bottle F7) | 550mL | 1ton  | Fuzhou    | Fujian   | 2022/5/20 |
| June | <i>Hypophthalmichthys molitrix</i>  | 550mL | 1000L | Shanghai  | Shanghai | 2022/6/17 |
|      | <i>Ctenopharyngodon idellus</i>     | 550mL | 1000L | Shanghai  | Shanghai | 2022/6/17 |
|      | <i>Hypophthalmichthys nobilis</i>   | 550mL | 1000L | Shanghai  | Shanghai | 2022/6/17 |
|      | <i>Carassius aumtus</i>             | 550mL | 1000L | Shanghai  | Shanghai | 2022/6/17 |
|      | <i>Scophthalmus maximus</i>         | 550mL | 2000L | Shanghai  | Shanghai | 2022/6/18 |
|      | <i>Siniperca chuatsi</i>            | 550mL | 2000L | Shanghai  | Shanghai | 2022/6/18 |
|      | <i>Mugil cephalus</i>               | 550mL | 2000L | Shanghai  | Shanghai | 2022/6/18 |
|      | <i>Ophiocephalus argus</i>          | 550mL | 2000L | Shanghai  | Shanghai | 2022/6/18 |
|      | <i>Pampus sinensis</i>              | 550mL | 1000L | Shanghai  | Shanghai | 2022/6/18 |
|      | <i>Carassius aumtus</i>             | 550mL | 2000L | Shanghai  | Shanghai | 2022/6/18 |
|      | <i>Megalobrama amblycephala</i>     | 550mL | 2000L | Shanghai  | Shanghai | 2022/6/18 |
|      | <i>Ctenopharyngodon idellus</i>     | 550mL | 1ton  | Jiangsu   | Zhejiang | 2022/6/17 |
|      | <i>Ctenopharyngodon idellus</i>     | 550mL | 1ton  | Jiangsu   | Zhejiang | 2022/6/17 |
|      | <i>Hypophthalmichthys nobilis</i>   | 550mL | 1ton  | Jiangxi   | Zhejiang | 2022/6/17 |
|      | <i>Scophthalmus maximus</i>         | 550mL | 1ton  | Jiangsu   | Zhejiang | 2022/6/18 |
|      | <i>Siniperca chuatsi</i>            | 550mL | 1ton  | Zhejiang  | Zhejiang | 2022/6/18 |
|      | <i>Lateolabrax japonicas</i>        | 550mL | 1ton  | Zhejiang  | Zhejiang | 2022/6/18 |
|      | <i>Carassius aumtus</i>             | 550mL | 1ton  | Zhejiang  | Zhejiang | 2022/6/18 |
|      | <i>Ctenopharyngodon idellus</i>     | 550mL | 1ton  | Zhejiang  | Zhejiang | 2022/6/18 |
|      | <i>Ophiocephalus argus</i>          | 550mL | 1ton  | Zhejiang  | Zhejiang | 2022/6/18 |
|      | <i>Hypophthalmichthys nobilis</i>   | 550mL | 1ton  | Jiangxi   | Zhejiang | 2022/6/18 |
|      | <i>Ophiocephalus argus</i>          | 550mL | 1ton  | Zhejiang  | Zhejiang | 2022/6/18 |
|      | <i>Sciaemops Ocellatus</i>          | 550mL | 1ton  | Fujian    | Zhejiang | 2022/6/19 |
|      | <i>Siniperca chuatsi</i>            | 550mL | 1ton  | Zhejiang  | Zhejiang | 2022/6/19 |
|      | <i>Pseudobagrus fulvidraco</i>      | 550mL | 1ton  | Zhejiang  | Zhejiang | 2022/6/19 |
|      | <i>Larimichthys crocea</i>          | 550mL | 1ton  | Fujian    | Zhejiang | 2022/6/19 |
|      | <i>Ophiocephalus argus</i>          | 550mL | 2ton  | Foshan    | Fujian   | 2022/6/16 |
|      | <i>Siniperca chuatsi</i>            | 550mL | 1ton  | Fujian    | Fujian   | 2022/6/16 |
|      | <i>Lateolabrax japonicus</i>        | 550mL | 2ton  | Fujian    | Fujian   | 2022/6/16 |
|      | <i>Siniperca chuatsi</i>            | 550mL | 2ton  | Guangzhou | Fujian   | 2022/6/17 |
|      | <i>Lateolabrax japonicus</i>        | 550mL | 2ton  | Guangzhou | Fujian   | 2022/6/17 |
| July | <i>Scophthalmus maximus</i>         | 550mL | 1000L | Shanghai  | Shanghai | 2022/7/13 |
|      | <i>Megalobrama amblycephala</i>     | 550mL | 1000L | Shanghai  | Shanghai | 2022/7/13 |
|      | <i>Ophiocephalus argus</i>          | 550mL | 1000L | Shanghai  | Shanghai | 2022/7/13 |
|      | <i>Mugil cephalus</i>               | 550mL | 1000L | Shanghai  | Shanghai | 2022/7/13 |
|      | <i>Carassius aumtus</i>             | 550mL | 1000L | Shanghai  | Shanghai | 2022/7/13 |
|      | <i>Hypophthalmichthys nobilis</i>   | 550mL | 1000L | Shanghai  | Shanghai | 2022/7/13 |
|      | <i>Hypophthalmichthys nobilis</i>   | 550mL | 1000L | Shanghai  | Shanghai | 2022/7/13 |
|      | <i>Ctenopharyngodon idellus</i>     | 550mL | 1000L | Shanghai  | Shanghai | 2015/7/14 |

|        |                                    |       |       |                   |          |           |
|--------|------------------------------------|-------|-------|-------------------|----------|-----------|
|        | <i>Carassius aumtus</i>            | 550mL | 1000L | Shanghai          | Shanghai | 2015/7/14 |
|        | <i>Siniperca chuatsi</i>           | 550mL | 5ton  | Guangdong         | Zhejiang | 2022/7/13 |
|        | <i>Lateolabrax japonicus</i>       | 550mL | 5ton  | Zhejiang          | Zhejiang | 2022/7/13 |
|        | <i>Ophiocephalus argus</i>         | 550mL | 100L  | Jiangsu           | Zhejiang | 2022/7/13 |
|        | <i>Lateolabrax japonicus</i>       | 550mL | 5ton  | Zhejiang          | Zhejiang | 2022/7/13 |
|        | <i>Pseudobagrus fulvidraco</i>     | 550mL | 5ton  | Zhejiang          | Zhejiang | 2022/7/13 |
|        | <i>Pseudobagrus fulvidraco</i>     | 550mL | 5ton  | Bozhou,Anhui      | Zhejiang | 2022/7/13 |
|        | <i>Hemiculter leucisculus</i>      | 550mL | 5ton  | Changzhou,Jiangsu | Zhejiang | 2022/7/13 |
|        | <i>Lateolabrax japonicus</i>       | 550mL | 5ton  | Zhejiang          | Zhejiang | 2022/7/14 |
|        | <i>Metapenaeus ensis</i>           | 550mL | 5ton  | Taizhou,Zhejiang  | Zhejiang | 2022/7/14 |
|        | <i>Macrobrachium rosenbergii</i>   | 550mL | 5ton  | Ningbo,Zhejiang   | Zhejiang | 2022/7/14 |
|        | <i>Ctenopharyngodon idellus</i>    | 550mL | 5ton  | Jiangxi           | Zhejiang | 2022/7/14 |
|        | <i>Carassius aumtus</i>            | 550mL | 5ton  | Yancheng,Jiangsu  | Zhejiang | 2022/7/14 |
|        | <i>Carassius aumtus</i>            | 550mL | 5ton  | Jiangsu           | Zhejiang | 2022/7/14 |
|        | <i>Ophiocephalus argus</i>         | 550mL | 5ton  | Zhejiang          | Zhejiang | 2022/7/14 |
|        | <i>Lateolabrax japonicus</i>       | 550mL | 5ton  | Suqian,Jiangsu    | Zhejiang | 2022/7/14 |
|        | <i>Hypophthalmichthys molitrix</i> | 550mL | 5ton  | Pingxiang,Jiangsu | Zhejiang | 2022/7/14 |
|        | <i>Carassius aumtus</i>            | 550mL | 5ton  | Jiangsu           | Zhejiang | 2022/7/14 |
|        | <i>Epinephelus</i>                 | 550mL | 5ton  | Fujian            | Fujian   | 2022/7/9  |
|        | <i>Pagrosomus major</i>            | 550mL | 5ton  | Fujian            | Fujian   | 2022/7/9  |
|        | <i>Epinephelus</i>                 | 550mL | 5ton  | Fujian            | Fujian   | 2022/7/9  |
|        | <i>Larimichthys crocea</i>         | 550mL | 5ton  | Fujian            | Fujian   | 2022/7/9  |
|        | <i>Scophthalmus maximus</i>        | 550mL | 5ton  | Shandong          | Fujian   | 2022/7/9  |
|        | <i>Lateolabrax japonicus</i>       | 550mL | 5ton  | Fujian            | Fujian   | 2022/7/9  |
|        | <i>Epinephelus</i>                 | 550mL | 5ton  | Fujian            | Fujian   | 2022/7/10 |
|        | <i>Scophthalmus maximus</i>        | 550mL | 5ton  | Fujian            | Fujian   | 2022/7/10 |
|        | <i>Scophthalmus maximus</i>        | 550mL | 5ton  | Shandong          | Fujian   | 2022/7/10 |
|        | <i>Scophthalmus maximus</i>        | 550mL | 5ton  | Shandong          | Fujian   | 2022/7/10 |
|        | <i>Megalobrama amblycephala</i>    | 550mL | 5ton  | Fujian            | Fujian   | 2022/7/10 |
| August | <i>Lateolabrax japonicus</i>       | 550mL | 20ton | Shanghai          | Shanghai | 2022/8/19 |
|        | <i>Megalobrama amblycephala</i>    | 550mL | 10ton | Jiangsu           | Shanghai | 2022/8/19 |
|        | <i>Carassius aumtus</i>            | 550mL | 20ton | Zhejiang          | Shanghai | 2022/8/19 |
|        | <i>Hypophthalmichthys nobilis</i>  | 550mL | 20ton | Jiangsu           | Shanghai | 2022/8/19 |
|        | <i>Ophiocephalus argus</i>         | 550mL | 20ton | Shandong          | Shanghai | 2022/8/19 |
|        | <i>Pseudobagrus fulvidraco</i>     | 550mL | 20ton | Anhui             | Shanghai | 2022/8/19 |
|        | <i>Pseudobagrus fulvidraco</i>     | 550mL | 20ton | Jiangsu           | Shanghai | 2022/8/19 |
|        | <i>Siniperca chuatsi</i>           | 550mL | 10ton | Guangdong         | Shanghai | 2022/8/19 |
|        | <i>Lateolabrax japonicus</i>       | 550mL | 20ton | Shanghai          | Shanghai | 2022/8/19 |
|        | <i>Scophthalmus maximus</i>        | 550mL | 10ton | Fujian            | Shanghai | 2022/8/19 |
|        | <i>Larimichthys crocea</i>         | 550mL | 20ton | Fujian            | Zhejiang | 2022/8/19 |
|        | <i>Carassius aumtus</i>            | 550mL | 20ton | Jiangsu           | Zhejiang | 2022/8/19 |
|        | <i>Larimichthys crocea</i>         | 550mL | 20ton | Fujian            | Zhejiang | 2022/8/19 |
|        | <i>Ctenopharyngodon idellus</i>    | 550mL | 20ton | Zhejiang          | Zhejiang | 2022/8/19 |

|           |                                    |       |       |          |          |           |
|-----------|------------------------------------|-------|-------|----------|----------|-----------|
|           | <i>Lateolabrax japonicus</i>       | 550mL | 20ton | Zhejiang | Zhejiang | 2022/8/20 |
|           | <i>Scophthalmus maximus</i>        | 550mL | 20ton | Shandong | Zhejiang | 2022/8/20 |
|           | <i>Ctenopharyngodon idellus</i>    | 550mL | 20ton | Jiangxi  | Zhejiang | 2022/8/20 |
|           | <i>Hypophthalmichthys nobilis</i>  | 550mL | 20ton | Jiangxi  | Zhejiang | 2022/8/20 |
|           | <i>Hypophthalmichthys nobilis</i>  | 550mL | 20ton | Jiangsu  | Zhejiang | 2022/8/20 |
|           | <i>Ophiocephalus argus</i>         | 550mL | 20ton | Zhejiang | Zhejiang | 2022/8/20 |
|           | <i>Ophiocephalus argus</i>         | 550mL | 20ton | Zhejiang | Zhejiang | 2022/8/20 |
|           | <i>Epinephelus</i>                 | 550mL | 20ton | Shandong | Zhejiang | 2022/8/21 |
|           | <i>Epinephelus</i>                 | 550mL | 2000L | Fujian   | Fujian   | 2022/8/18 |
|           | <i>Penaeus monodon</i>             | 550mL | 1000L | Fujian   | Fujian   | 2022/8/18 |
|           | <i>Carassius aumtus</i>            | 550mL | 2000L | Fujian   | Fujian   | 2022/8/19 |
|           | <i>Hypophthalmichthys nobilis</i>  | 550mL | 2000L | Fujian   | Fujian   | 2022/8/19 |
|           | <i>Ctenopharyngodon idellus</i>    | 550mL | 2000L | Fujian   | Fujian   | 2022/8/19 |
|           | <i>Epinephelus</i>                 | 550mL | 2000L | Fujian   | Fujian   | 2022/8/20 |
|           | <i>Sciaenops ocellatus</i>         | 550mL | 2000L | Fujian   | Fujian   | 2022/8/20 |
|           | <i>Pagrosomus major</i>            | 550mL | 2000L | Fujian   | Fujian   | 2022/8/20 |
|           | <i>Pampus sinensis</i>             | 550mL | 2000L | Fujian   | Fujian   | 2022/8/20 |
|           | <i>Lateolabrax japonicus</i>       | 550mL | 2000L | Fujian   | Fujian   | 2022/8/20 |
|           | <i>Carassius aumtus</i>            | 550mL | 10ton | Shanghai | Shanghai | 2022/9/23 |
|           | <i>Pseudobagrus fulvidraco</i>     | 550mL | 10ton | Shanghai | Shanghai | 2022/9/23 |
|           | <i>Lateolabrax japonicus</i>       | 550mL | 10ton | Shanghai | Shanghai | 2022/9/23 |
|           | <i>Pseudobagrus fulvidraco</i>     | 550mL | 10ton | Jiangsu  | Shanghai | 2022/9/23 |
|           | <i>Pseudobagrus fulvidraco</i>     | 550mL | 10ton | Zhejiang | Shanghai | 2022/9/23 |
|           | <i>Erythroculter ilishaeformis</i> | 550mL | 10ton | Zhejiang | Shanghai | 2022/9/23 |
|           | <i>Penaeus vannamei Boone</i>      | 550mL | 10ton | Jiangsu  | Shanghai | 2022/9/23 |
|           | <i>Penaeus monodon</i>             | 550mL | 10ton | Jiangsu  | Shanghai | 2022/9/23 |
|           | <i>Ictalurus Punetaus</i>          | 550mL | 10ton | Anhui    | Shanghai | 2022/9/23 |
|           | <i>Oxyeleotris marmorata</i>       | 550mL | 10ton | Guandong | Shanghai | 2022/9/23 |
|           | <i>Ctenopharyngodon idellus</i>    | 550mL | 2000L | Jiangsu  | Zhejiang | 2022/9/23 |
|           | <i>Carassius aumtus</i>            | 550mL | 1000L | Zhejiang | Zhejiang | 2022/9/23 |
| September | <i>Hypophthalmichthys nobilis</i>  | 550mL | 2000L | Zhejiang | Zhejiang | 2022/9/23 |
|           | <i>Lateolabrax japonicus</i>       | 550mL | 2000L | Jiangsu  | Zhejiang | 2022/9/23 |
|           | <i>Pagrosomus major</i>            | 550mL | 2000L | Zhejiang | Zhejiang | 2022/9/23 |
|           | <i>Lateolabrax japonicus</i>       | 550mL | 2000L | Zhejiang | Zhejiang | 2022/9/24 |
|           | <i>Siniperca chuatsi</i>           | 550mL | 2000L | Zhejiang | Zhejiang | 2022/9/24 |
|           | <i>Ctenopharyngodon idellus</i>    | 550mL | 2000L | Jiangsu  | Zhejiang | 2022/9/24 |
|           | <i>Hypophthalmichthys nobilis</i>  | 550mL | 2000L | Zhejiang | Zhejiang | 2022/9/24 |
|           | <i>Mylopharyngdon piceus</i>       | 550mL | 2000L | Jiangsu  | Zhejiang | 2022/9/24 |
|           | <i>Richardson</i>                  | 550mL | 2000L | Jiangsu  | Zhejiang | 2022/9/24 |
|           | <i>Pseudobagrus fulvidraco</i>     | 550mL | 10ton | Fujian   | Fujian   | 2022/9/23 |
|           | <i>Carassius aumtus</i>            | 550mL | 10ton | Fujian   | Fujian   | 2022/9/23 |
|           | <i>Siniperca chuatsi</i>           | 550mL | 10ton | Fujian   | Fujian   | 2022/9/23 |
| .....     | <i>Tinca tinca</i>                 | 550mL | 10ton | Fujian   | Fujian   | 2022/9/23 |

|         |                                   |       |       |           |          |            |
|---------|-----------------------------------|-------|-------|-----------|----------|------------|
|         | <i>Scophthalmus maximus</i>       | 550mL | 10ton | Fujian    | Fujian   | 2022/9/23  |
|         | <i>Siniperca chuatsi</i>          | 550mL | 10ton | Fujian    | Fujian   | 2022/9/24  |
|         | <i>Scophthalmus maximus</i>       | 550mL | 10ton | Shandong  | Fujian   | 2022/9/24  |
|         | <i>Trachinotus ovatus</i>         | 550mL | 10ton | Fujian    | Fujian   | 2022/9/24  |
|         | <i>Epinephelus</i>                | 550mL | 10ton | Fujian    | Fujian   | 2022/9/24  |
|         | <i>Lateolabrax japonicus</i>      | 550mL | 10ton | Guangdong | Fujian   | 2022/9/24  |
| October | <i>Macrobrachium rosenbergii</i>  | 550mL | 10ton | Shanghai  | Shanghai | 2022/10/22 |
|         | <i>Pseudobagrus fulvidraco</i>    | 550mL | 10ton | Zhejiang  | Shanghai | 2022/10/22 |
|         | <i>Penaeus monodon</i>            | 550mL | 10ton | Shanghai  | Shanghai | 2022/10/22 |
|         | <i>Pseudobagrus fulvidraco</i>    | 550mL | 10ton | Jiangsu   | Shanghai | 2022/10/22 |
|         | <i>Lateolabrax japonicus</i>      | 550mL | 10ton | Guangdong | Shanghai | 2022/10/22 |
|         | <i>Ophiocephalus argus</i>        | 550mL | 10ton | Zhejiang  | Shanghai | 2022/10/22 |
|         | <i>Carassius auratus</i>          | 550mL | 10ton | Jiangsu   | Shanghai | 2022/10/23 |
|         | <i>Penaeus vannamei</i>           | 550mL | 10ton | Zhejiang  | Shanghai | 2022/10/23 |
|         | <i>Cyprinus carpio</i>            | 550mL | 10ton | Jiangsu   | Shanghai | 2022/10/23 |
|         | <i>Carassius auratus</i>          | 550mL | 10ton | Jiangsu   | Shanghai | 2022/10/23 |
|         | <i>Ophiocephalus argus</i>        | 550mL | 10ton | Shandong  | Zhejiang | 2022/10/26 |
|         | <i>Lateolabrax japonicus</i>      | 550mL | 10ton | Zhejiang  | Zhejiang | 2022/10/26 |
|         | <i>Pseudobagrus fulvidraco</i>    | 550mL | 10ton | Anhui     | Zhejiang | 2022/10/26 |
|         | <i>Siniperca chuatsi</i>          | 550mL | 10ton | Guangdong | Zhejiang | 2022/10/26 |
|         | <i>Carassius auratus</i>          | 550mL | 10ton | Zhejiang  | Zhejiang | 2022/10/26 |
|         | <i>Siniperca chuatsi</i>          | 550mL | 10ton | Guangdong | Zhejiang | 2022/10/26 |
|         | <i>Lateolabrax japonicus</i>      | 550mL | 10ton | Zhejiang  | Zhejiang | 2022/10/26 |
|         | <i>Pagrus major</i>               | 550mL | 10ton | Fujian    | Zhejiang | 2022/10/26 |
|         | <i>Scophthalmus maximus</i>       | 550mL | 10ton | Fujian    | Zhejiang | 2022/10/26 |
|         | <i>Hypoplectrus indigo</i>        | 550mL | 10ton | Guangdong | Zhejiang | 2022/10/26 |
|         | <i>Epinephelus</i>                | 550mL | 2ton  | Shanghai  | Fujian   | 2022/10/26 |
|         | <i>Sciaenops ocellatus</i>        | 550mL | 2ton  | Jiangsu   | Fujian   | 2022/10/26 |
|         | <i>Ctenopharyngodon idella</i>    | 550mL | 2ton  | Zhejiang  | Fujian   | 2022/10/27 |
|         | <i>Hypophthalmichthys nobilis</i> | 550mL | 2ton  | Jiangsu   | Fujian   | 2022/10/27 |
|         | <i>Carassius auratus</i>          | 550mL | 2ton  | Shandong  | Fujian   | 2022/10/27 |
|         | <i>Trachinotus ovatus</i>         | 550mL | 2ton  | Anhui     | Fujian   | 2022/10/28 |
|         | <i>Lateolabrax japonicus</i>      | 550mL | 2ton  | Jiangsu   | Fujian   | 2022/10/28 |
|         | <i>Epinephelus</i>                | 550mL | 2ton  | Guangdong | Fujian   | 2022/10/28 |
|         | <i>Pagrus major</i>               | 550mL | 2ton  | Shanghai  | Fujian   | 2022/10/28 |
|         | <i>Sciaenops ocellatus</i>        | 550mL | 2ton  | Fujian    | Fujian   | 2022/10/28 |

Table S12 The 2022 Temporary Water Samples Sampling Record Form

| Sampling month | Name                               | Sampling amount | Base | place of origin | sampling area | sampling date |
|----------------|------------------------------------|-----------------|------|-----------------|---------------|---------------|
| April          | <i>Erythroculter ilishaeformis</i> | 550mL           | 1ton | Shanghai        | Shanghai      | 2022/4/15     |
|                | <i>Lateolabrax japonicus</i>       | 550mL           | 1ton | Shanghai        | Shanghai      | 2022/4/15     |

|     |                                                        |       |        |                              |          |           |
|-----|--------------------------------------------------------|-------|--------|------------------------------|----------|-----------|
|     | <i>Pseudobagrus fulvidraco</i>                         | 550mL | 1ton   | Zhejiang                     | Shanghai | 2022/4/15 |
|     | <i>Ophiocephalus argus</i>                             | 550mL | 1ton   | Shanghai                     | Shanghai | 2022/4/15 |
|     | <i>Carassius aumtus</i>                                | 550mL | 1ton   | Shanghai                     | Shanghai | 2022/4/15 |
|     | <i>Scophthalmus maximus</i>                            | 550mL | 1ton   | Shandong                     | Shanghai | 2022/4/15 |
|     | <i>Leiocassis longirostris</i>                         | 550mL | 1ton   | Jiangsu                      | Shanghai | 2022/4/15 |
|     | <i>Oreochromis spp</i>                                 | 550mL | 1ton   | Jiangsu                      | Shanghai | 2022/4/15 |
|     | <i>Lateolabrax japonicus</i>                           | 550mL | 1ton   | Shanghai                     | Shanghai | 2022/4/15 |
|     | <i>Siniperca chuatsi</i>                               | 550mL | 1ton   | Guangzhou                    | Shanghai | 2022/4/15 |
|     | <i>Ophiocephalus argus</i>                             | 550mL | 1ton   | Anhui                        | Shanghai | 2022/4/15 |
|     | <i>Carassius aumtus</i>                                | 550mL | 1ton   | Dianshan<br>Lake,Shanghai    | Shanghai | 2022/4/16 |
|     | <i>Hypophthalmichthys molitrix</i>                     | 550mL | 1ton   | Shanghai                     | Shanghai | 2022/4/16 |
|     | <i>Carassius aumtus</i>                                | 550mL | 1ton   | Chongming<br>Island,Shanghai | Shanghai | 2022/4/16 |
|     | <i>Ctenopharyngodon idellus</i>                        | 550mL | 1ton   | Sheyang,Jiangsu              | Shanghai | 2022/4/16 |
|     | <i>Pampus sinensis</i>                                 | 350mL | 1ton   | Fujian                       | Fujian   | 2022/4/14 |
|     | <i>Scophthalmus maximus</i>                            | 350mL | 1ton   | Shandong                     | Fujian   | 2022/4/14 |
|     | <i>Siniperca chuatsi</i>                               | 550mL | 1ton   | Ningbo                       | Zhejiang | 2022/4/16 |
|     | <i>Pagrosomus major</i>                                | 550mL | 1ton   | Ningbo                       | Zhejiang | 2022/4/16 |
|     | <i>Ophiocephalus argus,</i><br><i>Carassius aumtus</i> | 550mL | 1ton   | Ningbo                       | Zhejiang | 2022/4/16 |
| May | <i>Pseudobagrus fulvidraco</i>                         | 550mL | 0.5ton | Shanghai                     | Shanghai | 2022/5/18 |
|     | <i>Mugil cephalus</i>                                  | 550mL | 0.5ton | Shanghai                     | Shanghai | 2022/5/18 |
|     | <i>Ophiocephalus argus</i>                             | 550mL | 0.5ton | Shanghai                     | Shanghai | 2022/5/18 |
|     | <i>Penaeus monodon</i>                                 | 550mL | 0.5ton | Shanghai                     | Shanghai | 2022/5/18 |
|     | <i>Scophthalmus maximus</i>                            | 550mL | 0.5ton | Shandong                     | Shanghai | 2022/5/18 |
|     | <i>Siniperca chuatsi</i>                               | 550mL | 0.5ton | Guangzhou                    | Shanghai | 2022/5/18 |
|     | <i>Lateolabrax japonicus</i>                           | 550mL | 0.5ton | Guangzhou                    | Shanghai | 2022/5/18 |
|     | <i>Epinephelus</i>                                     | 550mL | 0.5ton | Fujian                       | Shanghai | 2022/5/18 |
|     | <i>Ictalurus Punctatus</i>                             | 550mL | 0.5ton | Jiangsu                      | Shanghai | 2022/5/18 |
|     | <i>Megalobrama amblycephala</i>                        | 550mL | 0.5ton | Shanghai                     | Shanghai | 2022/5/18 |
|     | <i>Ctenopharyngodon idellus</i>                        | 550mL | 0.5ton | Shanghai                     | Shanghai | 2022/5/19 |
|     | <i>Hypophthalmichthys nobilis</i>                      | 550mL | 0.5ton | Shanghai                     | Shanghai | 2022/5/19 |
|     | <i>Pseudobagrus fulvidraco</i>                         | 550mL | 0.5ton | Shanghai                     | Shanghai | 2022/5/19 |
|     | <i>Lateolabrax japonicus</i>                           | 550mL | 0.5ton | Guangzhou                    | Shanghai | 2022/5/19 |
|     | <i>Ophiocephalus argus</i>                             | 550mL | 0.5ton | Shanghai                     | Shanghai | 2022/5/19 |
|     | <i>Carassius aumtus</i>                                | 550mL | 10ton  | Jiangsu                      | Zhejiang | 2022/5/18 |
|     | <i>Megalobrama amblycephala</i>                        | 550mL | 1ton   | Jiangxi                      | Zhejiang | 2022/5/18 |
|     | <i>Ctenopharyngodon idellus</i>                        | 550mL | 0.5ton | Jiangsu                      | Zhejiang | 2022/5/18 |
|     | <i>Lateolabrax japonicus</i>                           | 550mL | 10ton  | Zhejiang                     | Zhejiang | 2022/5/18 |
|     | <i>Carassius aumtus</i>                                | 550mL | 5ton   | Jiangsu                      | Zhejiang | 2022/5/18 |
|     | <i>Hypophthalmichthys nobilis</i>                      | 550mL | 10ton  | Anhui                        | Zhejiang | 2022/5/18 |
|     | <i>Megalobrama amblycephala</i>                        | 550mL | 2ton   | Zhejiang                     | Zhejiang | 2022/5/18 |

|      |                                                    |       |        |          |          |           |
|------|----------------------------------------------------|-------|--------|----------|----------|-----------|
|      | <i>Ophiocephalus argus</i>                         | 550mL | 2ton   | Shanghai | Zhejiang | 2022/5/18 |
|      | <i>Ophiocephalus argus</i>                         | 550mL | 1ton   | Zhejiang | Zhejiang | 2022/5/18 |
|      | <i>Carassius aumtus</i>                            | 550mL | 0.5ton | Jiangsu  | Zhejiang | 2022/5/18 |
|      | <i>Ophiocephalus argus</i>                         | 550mL | 0.5ton | Zhejiang | Zhejiang | 2022/5/19 |
|      | <i>Pseudobagrus fulvidraco</i>                     | 550mL | 0.5ton | Anhui    | Zhejiang | 2022/5/19 |
|      | <i>Ophiocephalus argus</i>                         | 550mL | 1ton   | Anhui    | Zhejiang | 2022/5/19 |
|      | <i>Oreochromis spp</i>                             | 550mL | 0.5ton | Zhejiang | Zhejiang | 2022/5/19 |
|      | <i>Megalobrama amblycephala</i>                    | 550mL | 1ton   | Zhejiang | Zhejiang | 2022/5/19 |
|      | <i>Lateolabrax japonicus</i><br>(bottle X2)        | 550mL | 2ton   | Xiamen   | Fujian   | 2022/5/18 |
|      | <i>Pampus sinensis</i><br>(bottle X4)              | 550mL | 2ton   | Xiamen   | Fujian   | 2022/5/18 |
|      | <i>Pagrosomus major</i><br>(bottle X6)             | 550mL | 2ton   | Xiamen   | Fujian   | 2022/5/18 |
|      | <i>Penaeus vannamei</i><br>(X8)                    | 550mL | 2ton   | Xiamen   | Fujian   | 2022/5/18 |
|      | <i>Larimichthys crocea 105</i><br>(bottle X10)     | 550mL | 2ton   | Xiamen   | Fujian   | 2022/5/18 |
|      | <i>Larimichthys crocea 106</i><br>(bottle F2)      | 550mL | 2ton   | Fuzhou   | Fujian   | 2022/5/19 |
|      | <i>Scophthalmus maximus</i><br>(bottle F3)         | 550mL | 2ton   | Fuzhou   | Fujian   | 2022/5/19 |
|      | <i>Megalobrama amblycephala</i><br>(bottle F3)     | 550mL | 2ton   | Fuzhou   | Fujian   | 2022/5/19 |
|      | <i>Lateolabrax japonicus</i><br>(bottle F7)        | 550mL | 2ton   | Fuzhou   | Fujian   | 2022/5/19 |
|      | <i>Siniperca chuatsi</i><br>(bottle F8)            | 550mL | 2ton   | Fuzhou   | Fujian   | 2022/5/19 |
|      | <i>Pseudobagrus fulvidraco</i><br>(bottle F10)     | 550mL | 2ton   | Fuzhou   | Fujian   | 2022/5/19 |
|      | <i>Hypophthalmichthys nobilis</i><br>(bottle F12)  | 550mL | 2ton   | Fuzhou   | Fujian   | 2022/5/20 |
|      | <i>Hypophthalmichthys molitrix</i><br>(bottle F14) | 550mL | 2ton   | Fuzhou   | Fujian   | 2022/5/20 |
|      | <i>Ctenopharyngodon idellus</i><br>(bottle F16)    | 550mL | 2ton   | Fuzhou   | Fujian   | 2022/5/20 |
|      | <i>Carassius aumtus</i><br>(bottle F18)            | 550mL | 2ton   | Fuzhou   | Fujian   | 2022/5/20 |
| June | <i>Hypophthalmichthys molitrix</i>                 | 550mL | 2000L  | Shanghai | Shanghai | 2022/6/17 |
|      | <i>Ctenopharyngodon idellus</i>                    | 550mL | 2000L  | Shanghai | Shanghai | 2022/6/17 |
|      | <i>Hypophthalmichthys nobilis</i>                  | 550mL | 2000L  | Shanghai | Shanghai | 2022/6/17 |
|      | <i>Carassius aumtus</i>                            | 550mL | 2000L  | Shanghai | Shanghai | 2022/6/17 |
|      | <i>Ophiocephalus argus</i>                         | 550mL | 1000L  | Shanghai | Shanghai | 2022/6/17 |

|      |                                   |       |       |           |          |           |
|------|-----------------------------------|-------|-------|-----------|----------|-----------|
| July | <i>Scophthalmus maximus</i>       | 550mL | 2000L | Shanghai  | Shanghai | 2022/6/18 |
|      | <i>Siniperca chuatsi</i>          | 550mL | 2000L | Shanghai  | Shanghai | 2022/6/18 |
|      | <i>Pseudobagrus fulvidraco</i>    | 550mL | 1000L | Shanghai  | Shanghai | 2022/6/18 |
|      | <i>Mugil cephalus</i>             | 550mL | 1000L | Shanghai  | Shanghai | 2022/6/18 |
|      | <i>Ophiocephalus argus</i>        | 550mL | 2000L | Shanghai  | Shanghai | 2022/6/18 |
|      | <i>Pampus sinensis</i>            | 550mL | 2000L | Shanghai  | Shanghai | 2022/6/18 |
|      | <i>Epinephelus</i>                | 550mL | 1000L | Shanghai  | Shanghai | 2022/6/18 |
|      | <i>Carassius aumtus</i>           | 550mL | 1000L | Shanghai  | Shanghai | 2022/6/18 |
|      | <i>Megalobrama amblycephala</i>   | 550mL | 1000L | Shanghai  | Shanghai | 2022/6/18 |
|      | <i>Lateolabrax japonicus</i>      | 550mL | 2000L | Shanghai  | Shanghai | 2022/6/18 |
|      | <i>Ctenopharyngodon idellus</i>   | 550mL | 2ton  | Jiangsu   | Zhejiang | 2022/6/17 |
|      | <i>Hypophthalmichthys nobilis</i> | 550mL | 2ton  | Jiangsu   | Zhejiang | 2022/6/17 |
|      | <i>Hypophthalmichthys nobilis</i> | 550mL | 2ton  | Jiangxi   | Zhejiang | 2022/6/17 |
|      | <i>Scophthalmus maximus</i>       | 550mL | 2ton  | Jiangsu   | Zhejiang | 2022/6/18 |
|      | <i>Siniperca chuatsi</i>          | 550mL | 2ton  | Zhejiang  | Zhejiang | 2022/6/18 |
|      | <i>Lateolabrax japonicus</i>      | 550mL | 2ton  | Zhejiang  | Zhejiang | 2022/6/18 |
|      | <i>Carassius aumtus</i>           | 550mL | 2ton  | Zhejiang  | Zhejiang | 2022/6/18 |
|      | <i>Ctenopharyngodon idellus</i>   | 550mL | 2ton  | Zhejiang  | Zhejiang | 2022/6/18 |
|      | <i>Ophiocephalus argus</i>        | 550mL | 2ton  | Zhejiang  | Zhejiang | 2022/6/18 |
|      | <i>Hypophthalmichthys nobilis</i> | 550mL | 2ton  | Jiangxi   | Zhejiang | 2022/6/18 |
|      | <i>Ophiocephalus argus</i>        | 550mL | 2ton  | Zhejiang  | Zhejiang | 2022/6/18 |
|      | <i>Sciaemops Ocellatus</i>        | 550mL | 2ton  | Fujian    | Zhejiang | 2022/6/19 |
|      | <i>Siniperca chuatsi</i>          | 550mL | 2ton  | Zhejiang  | Zhejiang | 2022/6/19 |
|      | <i>Pseudobagrus fulvidraco</i>    | 550mL | 2ton  | Zhejiang  | Zhejiang | 2022/6/19 |
|      | <i>Larimichthys crocea</i>        | 550mL | 2ton  | Fujian    | Zhejiang | 2022/6/19 |
|      | <i>Scophthalmus maximus</i>       | 550mL | 2ton  | Shandong  | Fujian   | 2022/6/16 |
|      | <i>Mugil cephalus</i>             | 550mL | 2ton  | Fujian    | Fujian   | 2022/6/16 |
|      | <i>Megalobrama amblycephala</i>   | 550mL | 1ton  | Fujian    | Fujian   | 2022/6/16 |
|      | <i>Carassius aumtus</i>           | 550mL | 2ton  | Fujian    | Fujian   | 2022/6/16 |
|      | <i>Pseudobagrus fulvidraco</i>    | 550mL | 1ton  | Guangzhou | Fujian   | 2022/6/17 |
|      | <i>Megalobrama amblycephala</i>   | 550mL | 1ton  | Guangzhou | Fujian   | 2022/6/17 |
|      | <i>Scophthalmus maximus</i>       | 550mL | 2ton  | Xiamen    | Fujian   | 2022/6/17 |
|      | <i>Cyprinus carpio</i>            | 550mL | 1ton  | Shandong  | Fujian   | 2022/6/17 |
|      | <i>Leiocassis longirostris</i>    | 550mL | 2ton  | Shandong  | Fujian   | 2022/6/17 |
|      | <i>Acipensersinensis</i>          | 550mL | 3ton  | Nanning   | Fujian   | 2022/6/17 |
|      | <i>Scophthalmus maximus</i>       | 550mL | 2000L | Shanghai  | Shanghai | 2022/7/13 |
|      | <i>Epinephelus</i>                | 550mL | 2000L | Shanghai  | Shanghai | 2022/7/13 |
|      | <i>Megalobrama amblycephala</i>   | 550mL | 2000L | Shanghai  | Shanghai | 2022/7/13 |
|      | <i>Siniperca chuatsi</i>          | 550mL | 2000L | Shanghai  | Shanghai | 2022/7/13 |
|      | <i>Ophiocephalus argus</i>        | 550mL | 2000L | Shanghai  | Shanghai | 2022/7/13 |
|      | <i>Mugil cephalus</i>             | 550mL | 2000L | Shanghai  | Shanghai | 2022/7/13 |
|      | <i>Carassius aumtus</i>           | 550mL | 2000L | Shanghai  | Shanghai | 2022/7/13 |
|      | <i>Hypophthalmichthys nobilis</i> | 550mL | 2000L | Shanghai  | Shanghai | 2022/7/13 |

|                                   |       |       |           |          |           |
|-----------------------------------|-------|-------|-----------|----------|-----------|
| <i>Pagrosomus major</i>           | 550mL | 2000L | Shanghai  | Shanghai | 2022/7/13 |
| <i>Pampus sinensis</i>            | 550mL | 2000L | Shanghai  | Shanghai | 2022/7/13 |
| <i>Hypophthalmichthys nobilis</i> | 550mL | 2000L | Shanghai  | Shanghai | 2022/7/14 |
| <i>Ctenopharyngodon idellus</i>   | 550mL | 2000L | Shanghai  | Shanghai | 2022/7/14 |
| <i>Carassius aumtus</i>           | 550mL | 2000L | Shanghai  | Shanghai | 2022/7/14 |
| <i>Siniperca chuatsi</i>          | 550mL | 1000L | Shanghai  | Shanghai | 2022/7/14 |
| <i>Lateolabrax japonicus</i>      | 550mL | 1000L | Shanghai  | Shanghai | 2022/7/14 |
| <i>Lateolabrax japonicus</i>      | 550mL | 100L  | Zhejiang  | Zhejiang | 2022/7/13 |
| <i>Siniperca chuatsi</i>          | 550mL | 100L  | Guangdong | Zhejiang | 2022/7/13 |
| <i>Pseudobagrus fulvidrac</i>     | 550mL | 100L  | Jiangsu   | Zhejiang | 2022/7/13 |
| <i>Mugil cephalus</i>             | 550mL | 100L  | Zhejiang  | Zhejiang | 2022/7/13 |
| <i>Hypophthalmichthys nobilis</i> | 550mL | 100L  | Zhejiang  | Zhejiang | 2022/7/13 |
| <i>Carassius aumtus</i>           | 550mL | 100L  | Jiangsu   | Zhejiang | 2022/7/13 |
| <i>Pagrosomus major</i>           | 550mL | 100L  | Fujian    | Zhejiang | 2022/7/14 |
| <i>Siniperca chuatsi</i>          | 550mL | 100L  | Guangdong | Zhejiang | 2022/7/14 |
| <i>Megalobrama amblycephala</i>   | 550mL | 100L  | Jiangsu   | Zhejiang | 2022/7/14 |
| <i>Lateolabrax japonicus</i>      | 550mL | 100L  | Zhejiang  | Zhejiang | 2022/7/14 |
| <i>Carassius aumtus</i>           | 550mL | 100L  | Zhejiang  | Zhejiang | 2022/7/14 |
| <i>Epinephelus</i>                | 550mL | 100L  | Guangdong | Zhejiang | 2022/7/14 |
| <i>Scophthalmus maximus</i>       | 550mL | 100L  | Fujian    | Zhejiang | 2022/7/14 |
| <i>Lateolabrax japonicus</i>      | 550mL | 100L  | Zhejiang  | Zhejiang | 2022/7/14 |
| <i>Epinephelus</i>                | 550mL | 2ton  | Fujian    | Fujian   | 2022/7/9  |
| <i>Pagrosomus major</i>           | 550mL | 2ton  | Fujian    | Fujian   | 2022/7/9  |
| <i>Epinephelus</i>                | 550mL | 2ton  | Fujian    | Fujian   | 2022/7/9  |
| <i>Larimichthys crocea</i>        | 550mL | 2ton  | Fujian    | Fujian   | 2022/7/9  |
| <i>Scophthalmus maximus</i>       | 550mL | 2ton  | Shandong  | Fujian   | 2022/7/9  |
| <i>Lateolabrax japonicus</i>      | 550mL | 2ton  | Fujian    | Fujian   | 2022/7/9  |
| <i>Epinephelus</i>                | 550mL | 2ton  | Fujian    | Fujian   | 2022/7/10 |
| <i>Scophthalmus maximus</i>       | 550mL | 2ton  | Fujian    | Fujian   | 2022/7/10 |
| <i>Scophthalmus maximus</i>       | 550mL | 2ton  | Shandong  | Fujian   | 2022/7/10 |
| <i>Scophthalmus maximus</i>       | 550mL | 2ton  | Shandong  | Fujian   | 2022/7/10 |
| <i>Megalobrama amblycephala</i>   | 550mL | 2ton  | Fujian    | Fujian   | 2022/7/10 |
